# *XRN1* is a Species-Specific Virus

## Restriction Factor in Yeasts

Paul A. Rowley<sup>1,2,†</sup>, Brandon Ho<sup>2</sup>, Sarah Bushong<sup>2</sup>, Arlen Johnson<sup>2</sup>, Sara L. Sawyer<sup>1,2,\*</sup>

<sup>1</sup> BioFrontiers Institute, University of Colorado Boulder, Boulder, Colorado, USA.

<sup>2</sup> Section of Molecular Biosciences, University of Texas at Austin, Austin, Texas, USA.

<sup>†</sup> Current address: Department of Biological Sciences, University of Idaho, Moscow, Idaho, USA.

\* Corresponding author, [ssawyer@colorado.edu](mailto:ssawyer@colorado.edu)

## 23 **Abstract**

24           In eukaryotes, the degradation of cellular mRNAs is accomplished by Xrn1p and  
25 the cytoplasmic exosome. Because viral RNAs often lack canonical caps or poly-A tails,  
26 they can also be vulnerable to degradation by these host exonucleases. Yeast lack  
27 sophisticated mechanisms of innate and adaptive immunity, but do use RNA  
28 degradation as an antiviral defense mechanism. One model is that the RNA of yeast  
29 viruses is subject to degradation simply as a side effect of the intrinsic exonuclease  
30 activity of proteins involved in RNA metabolism. Contrary to this model, we find a highly  
31 refined, species-specific relationship between Xrn1p and the “L-A” totiviruses of different  
32 *Saccharomyces* yeast species. We show that the gene *XRN1* has evolved rapidly under  
33 positive natural selection in *Saccharomyces* yeast, resulting in high levels of Xrn1p  
34 protein sequence divergence from one yeast species to the next. We also show that  
35 these sequence differences translate to differential interactions with the L-A virus, where  
36 Xrn1p from *S. cerevisiae* is most efficient at controlling the L-A virus that chronically  
37 infects *S. cerevisiae*, and Xrn1p from *S. kudriavzevii* is most efficient at controlling the L-  
38 A-like virus that we have discovered within *S. kudriavzevii*. All Xrn1p orthologs are  
39 equivalent in their interaction with another virus-like parasite, the Ty1 retrotransposon.  
40 Thus, the activity of Xrn1p against totiviruses is not simply an incidental consequence of  
41 the enzymatic activity of Xrn1p, but rather Xrn1p co-evolves with totiviruses to maintain  
42 its potent antiviral activity and limit viral propagation in *Saccharomyces* yeasts.  
43 Consistent with this, we demonstrated that Xrn1p physically interacts with the Gag  
44 protein encoded by the L-A virus, suggesting a host-virus interaction that is more  
45 complicated than just Xrn1p-mediated nucleolytic digestion of viral RNAs.

46

## 47 Introduction

48 Degradation of mRNAs is a process essential to cell viability. Degradation  
49 pathways eliminate aberrant mRNAs, and also act to control gene expression levels.  
50 This process typically begins with host enzymes that perform either deadenylation or  
51 decapping on mRNAs targeted for degradation [1]. Following decapping, mRNAs are  
52 typically degraded by the 5' to 3' cytoplasmic exonuclease, Xrn1 [2,3]. Alternatively,  
53 after deadenylation, mRNAs can be subject to 3' to 5' degradation by the cytoplasmic  
54 exosome [4-6]. Viral transcripts and viral RNA genomes usually do not bear the  
55 canonical 5' methylated cap structures or the 3' polyadenylated (poly(A)) tails typical of  
56 cellular mRNAs, making them vulnerable to destruction by these host mRNA  
57 degradation pathways. In fact, it has been observed that Xrn1 and components of the  
58 exosome efficiently restrict virus replication in eukaryotes as diverse as mammals and  
59 yeasts [7-11]. As a result, mammalian viruses have evolved diverse countermeasures to  
60 prevent degradation by these proteins [7,8,12-18]. Still unknown is whether the host  
61 proteins like Xrn1 and components of the exosome can co-evolve with viruses to  
62 circumvent viral countermeasures. While such tit-for-tat evolution is common in  
63 mammalian innate immunity pathways, mRNA degradation is essential to the host and  
64 would be expected to be subject to strong evolutionary constraint.

65  
66 *Saccharomyces* yeasts are known to harbor very few viruses [19]. Further, all  
67 yeast viruses are unable to escape their host cell, and instead are transmitted vertically  
68 through mating or during mitotic cell division. Almost all described species of  
69 *Saccharomyces* yeasts play host to double-stranded RNA (dsRNA) viruses of the family  
70 *Totiviridae* [20,21]. In fact, most commonly used *S. cerevisiae* laboratory strains are  
71 infected with a totivirus named L-A (Fig 1A) [22]. When initially synthesized, the RNAs

72 produced by the L-A virus RNA-dependent RNA polymerase lack both a cap structure  
73 [23,24] and a poly(A) tail [25], and are vulnerable to degradation by Xrn1p [8] and the  
74 cytoplasmic exosome [14,26]. 3'-to-5' degradation of viral RNAs by the cytoplasmic  
75 exosome is linked to the action of the SKI complex (Ski2, Ski3, Ski7, and Ski8), which  
76 acts to funnel aberrant RNAs into the nucleolytic core of the exosome [5,6]. The  
77 disruption of exosome and SKI complex genes has been shown to cause higher  
78 expression of viral RNAs, higher virus genome copy number, and an overproduction of  
79 virus-encoded toxins (i.e. the "superkiller" phenotype) [11,14,27]. In addition, the 5'-to-3'  
80 exonuclease Xrn1p degrades viral transcripts and genomes of several RNA viruses in  
81 yeasts [8,24,28].

82  
83  
84  
85  
86  
87  
88  
89  
90  
91  
92  
93  
94  
95  
96  
97  
98  
99

**Fig 1. Evolutionary analysis of *Saccharomyces* genes involved in RNA metabolism.** (A) Schematic of the lifecycle of the L-A virus of *S. cerevisiae*. Starting at the bottom of the figure, new viral positive sense single-stranded RNA (+ssRNA) is synthesized within the L-A virus capsid and extruded into the cytoplasm. The enzymatic activity of the viral Gag protein "steals" cap structures from host mRNAs and conjugates them to viral +ssRNAs. The capped viral +ssRNA is used as a template for translation and any remaining uncapped +ssRNA is encapsidated to form new viral particles by interaction with the L-A polymerase protein. Packaged +ssRNA is used as a template during negative strand synthesis to produce viral genomic dsRNA. (B) A cartoon representation of 5'-to-3' and 3'-to-5' RNA degradation by Xrn1p and the SKI/exosome complex, respectively, adapted from Parker *et al.* [29]. (C) Evolutionary analysis of *XRN1* and genes of the SKI/exosome complex. An alignment of each gene was analyzed using 4 common tests for positive selection (PAML, FEL, REL, and MEME) as fully described in Table S1. "Yes" indicates that there is positive selection detected in this gene by the indicated test.

100 Viruses and their hosts exist in a constant state of genetic conflict, where what is  
101 advantageous for one party is often disadvantageous for the other. Both genomes  
102 experience selection for mutations that benefit their own fitness but, particularly in yeast  
103 where viruses are strictly intracellular, the virus will be bounded in this process by the  
104 fact that if it begins to replicate too well, it may kill its host. Co-evolutionary battles  
105 between hosts and viruses play out in the physical interaction interfaces between

106 interacting host and viral proteins (reviewed in [30-32]). One party is selected to reduce  
107 these interactions, and the other party is selected to strengthen them. For instance,  
108 there are many examples showing that mammalian restriction factors are selected to  
109 better recognize their viral targets, while viruses are continuously selected to escape that  
110 interaction, or to encode an antagonist protein that neutralizes the restriction factor.  
111 Because there is no equilibrium in these systems, this process cycles over and over,  
112 causing unusual signatures of evolution in both the host and virus proteins engaged in  
113 this interaction. While host protein complexes (host proteins interacting with other host  
114 proteins) can sometimes become co-evolved, this process of within-species refinement  
115 of protein-protein interactions is not the same as the dynamic and recurrent selection for  
116 new amino acids at interaction interfaces between host and pathogen proteins. The two  
117 scenarios can be disentangled using a metric that looks for codons that have  
118 accumulated a significantly higher rate of nonsynonymous mutations (dN) than even  
119 synonymous mutations (dS). The signature of  $dN/dS > 1$  commonly results from the  
120 repeated cycles of selection that occurs in genetic conflict scenarios [43], but has never  
121 been shown to be driven by subtler processes like the refinement of within-host physical  
122 interactions.

123

124 Host genes in genetic conflict with viruses diverge in sequence in a manner that  
125 alters interactions with viruses. For this reason, these proteins become non-equivalent  
126 between host species from the perspective of viruses. Highly diverged host proteins  
127 reinforce species barriers, making it difficult for viruses to move from their current host  
128 species into new host species (for example, [33,34]). Since yeast have limited antiviral  
129 strategies, we reasoned that evolutionary pressure on the RNA quality control pathways  
130 to thwart the replication of RNA viruses might be especially intense. This led us to  
131 investigate the unique evolutionary scenario involving a restriction system employing

132 proteins critical to RNA turnover and cellular homeostasis.

133 In this study, we analyzed whether or not any components of the yeast RNA  
134 degradation pathways mentioned above are evolving under positive natural selection,  
135 potentially indicative of tit-for-tat coevolution with viruses. We identified this evolutionary  
136 signature in at least two genes involved in RNA metabolism, *RRP40* and *XRN1*, and  
137 then undertook an in depth functional analysis of *XRN1*. To test the hypothesis that  
138 Xrn1p has been honed by co-evolution to target and restrict totiviruses, we made a  
139 series of *S. cerevisiae* strains where *XRN1* is replaced with wild-type orthologs from  
140 other *Saccharomyces* species. All *XRN1* orthologs fully complemented an *XRN1*  
141 knockout strain of *S. cerevisiae*, as assessed by several assays. On the other hand, we  
142 found that *XRN1* orthologs were different in their ability to control the replication of the L-  
143 A virus. Xrn1p from *S. cerevisiae* was most efficient at controlling the L-A virus that  
144 chronically infects *S. cerevisiae*, and Xrn1p from *S. kudriavzevii* was most efficient at  
145 controlling the L-A-like virus (SkV-L-A1) that we discovered within *S. kudriavzevii*. All  
146 *XRN1* orthologs were equivalent in their interaction with another virus-like parasite, the  
147 Ty1 retrotransposon. Our identification of signatures of positive selection and species-  
148 specific virus restriction suggests that *XRN1* can be tuned by natural selection to better  
149 restrict totivirus in response to the evolution of these viruses over time. We show that the  
150 structure of Xrn1p affords the flexibility to change in response to selective pressure from  
151 totiviruses, while also maintaining cellular functions.

152

153

## 154 **Results**

155

### 156 **Components of the yeast RNA degradation pathway are evolving under positive** 157 **selection**

158 To differentiate between models where Xrn1p restricts L-A through a passive  
159 mechanism that is incidental to its inherent exonuclease activity, or through an active  
160 mechanism where Xrn1p evolves to optimally suppress L-A replication, we first looked  
161 for evidence of positive selection ( $dN/dS > 1$ ) within the genes encoding the major  
162 components of the SKI complex, the exosome, and Xrn1p (Fig 1B). Importantly,  
163 signatures of positive selection do not identify the genes that are most important for  
164 controlling viral replication. These statistical tests are designed to identify host proteins  
165 that are involved in direct physical interactions with viruses, and which also have the  
166 evolutionary flexibility to change in response to viral selective pressure, becoming  
167 species-specific in the process. For this reason, we would neither expect to identify  
168 signatures of positive selection in all genes known to be involved in controlling  
169 totiviruses, nor in all genes encoding components of a complex like the exosome. For  
170 each gene, we collected sequences from six divergent species of *Saccharomyces* (*S.*  
171 *cerevisiae*, *S. paradoxus*, *S. mikatae*, *S. kudriavzevii*, *S. arboricolus*, and *S. bayanus*)  
172 [44-46] and created a multiple sequence alignment. We then analyzed each alignment  
173 for evidence of codons with  $dN/dS > 1$  using four commonly employed tests for positive  
174 selection [47,48]. We see some evidence for positive selection of specific codon sites in  
175 several of these genes, however, only *XRN1* and the exosome subunit gene *RRP40*  
176 passed all four tests (Fig 1C; Table S1). Other genes are determined to be under  
177 positive selection by some tests, and may be of interest to explore further. Of *XRN1* and

178 *RRP40*, the impact of *XRN1* on viral replication has been more directly substantiated [7-  
179 9,13-16,35-37,49-53], so we focused our attention on this gene. However, it should be  
180 noted that *RRP40* encodes a component of the cytoplasmic exosome, which, in  
181 conjunction with the SKI complex, is clearly linked to the restriction of L-A [11,14,27].

182

### 183 **Xrn1p is species-specific in the restriction of L-A virus**

184 We next tested if *S. cerevisiae XRN1* has been tailored by co-evolution with the  
185 L-A virus. Double-stranded RNA (dsRNA) purified from an *S. cerevisiae xrn1Δ* strain  
186 migrates as a distinct band of 4.6 kilobase pairs (Fig 2A), which is consistent with the  
187 size of the L-A virus genome, and its identity was further confirmed by RT-PCR (Fig S1).  
188 We confirmed a strong reduction in dsRNA when the *xrn1Δ* strain was complemented  
189 with plasmid-mounted *XRN1* from *S. cerevisiae* under the transcriptional control of its  
190 native promoter (Fig 2A), consistent with the published role of Xrn1p as an L-A  
191 restriction factor [8,14,24,27]. On the other hand, catalytically-dead versions of Xrn1p  
192 (E176G and Δ1206-1528) did not suppress L-A dsRNA levels (Fig 2B), as has been  
193 previously described [54]. We next performed heterospecific (other species)  
194 complementation by introducing the *XRN1* from *S. mikatae*, *S. kudriavzevii*, or *S.*  
195 *bayanus* into the *S. cerevisiae xrn1Δ* strain. These species were chosen as they are  
196 representative of the diversity found within the *sensu stricto* complex of *Saccharomyces*  
197 yeasts. Strikingly, no other Xrn1p was able to reduce L-A dsRNA to the same extent as  
198 Xrn1p from *S. cerevisiae* (Fig 2A). Xrn1p from *S. mikatae*, the closest relative to *S.*  
199 *cerevisiae* in this species set, was capable of slightly reducing L-A dsRNA abundance.  
200 Xrn1p from *S. bayanus* and *S. kudriavzevii* appear to have levels of dsRNA similar to  
201 *xrn1Δ*, indicating little or no effect on L-A copy number. In summary, we find that *XRN1*  
202 orthologs vary in their ability to restrict the *S. cerevisiae* L-A virus. This is somewhat



203 surprising for a critical and conserved gene involved in RNA quality control, but  
204 consistent with the signatures of positive selection which suggest that certain parts of  
205 this protein are highly divergent between species.

206

207 **Fig 2. The effect of *XRN1* evolution on the restriction of the L-A and killer**  
208 **viruses of *S. cerevisiae*.** (A) (Top row) dsRNA extraction from *S. cerevisiae*  
209 *xrn1Δ* with or without complementation by *XRN1* from different species of  
210 *Saccharomyces* (*S. cer* – *S. cerevisiae*; *S. mik* – *S. mikatae*; *S. kud* – *S.*  
211 *kudriavzevii*; *S. bay* – *S. bayanus*). From the same agarose gel, the first two  
212 lanes were spliced to the last three lanes for clarity. (Bottom two rows) Western  
213 blots showing the expression of HA-tagged Xrn1 and Adh1 (control) within each  
214 complemented strain. (B) (Top) Domain diagrams of Xrn1p showing the position  
215 of the catalytic residue E176 and the location of the C-terminal truncations of  
216 Xrn1p (dashed line). Xrn1p with the E176G mutation or the Δ1206-1528  
217 truncation are catalytically inactive, as described previously [54]. (Bottom) dsRNA  
218 extraction from *S. cerevisiae xrn1Δ* expressing wild type *XRN1*, the catalytically  
219 inactive *XRN1*(E176G) or truncation mutants of Xrn1p (all derived from *S.*  
220 *cerevisiae*). (C) A representative picture of *S. cerevisiae* killer (L-A<sup>+</sup> Killer<sup>+</sup>) and  
221 non-killer (L-A<sup>-</sup> Killer<sup>-</sup>) yeasts and the effect of killer toxin expression on the  
222 growth of a lawn of sensitive yeast. (D) The effect of Xrn1p expression on the  
223 diameter of the kill zones around killer yeast. Asterisks are indicative of a  
224 significant difference in mean kill zone area compared to all other samples tested  
225 (Tukey-Kramer test p<0.05). See figure S2 for example images of the kill zones  
226 for each sample.  
227

228

229 We next used a functional and quantitative assay to confirm the species-specific  
230 effects of *XRN1* on virus replication. This assay exploits the dsRNA “killer virus” (also  
231 known as M virus). The killer virus is a satellite RNA of L-A and is totally dependent on  
232 L-A proteins for replication. It uses L-A-encoded proteins to encapsidate and replicate  
233 its genome, and to synthesize and cap its RNA transcripts [12]. The killer virus encodes  
234 only a single protein, a secreted toxin referred to as the killer toxin [19,55,56]. The result  
235 is that “killer yeast” colonies, i.e. those infected with both L-A and the killer virus, kill  
236 neighboring cells via the diffusion of toxin into the surrounding medium (Fig 2C).  
237 Importantly, resistance to the killer toxin is provided by the pre-processed, immature  
238 form of the toxin, supplying killer yeast cells with an antidote to their own poison [55]. It

239 has been shown previously that Xrn1p can inhibit the expression of the killer phenotype  
240 by degrading uncapped killer virus RNAs [14,57]. Therefore, we use the presence and  
241 size of kill zones produced by killer yeasts as a quantitative measurement of killer virus  
242 RNA production in the presence of each Xrn1p ortholog.

243

244 A strain of *S. cerevisiae* lacking *XRN1*, but harboring both the L-A and killer virus  
245 (*xrn1* $\Delta$ L-A<sup>+</sup> Killer<sup>+</sup>), was complemented with each *XRN1* ortholog. Clonal isolates from  
246 each complemented strain were grown to mid-log phase, and 6 x 10<sup>5</sup> cells were spotted  
247 onto an agar plate seeded with a lawn of toxin-sensitive yeast. After several days'  
248 incubation at room temperature, kill zones around these culture spots were measured  
249 and the total area calculated. The transformation of *xrn1* $\Delta$  L-A<sup>+</sup> Killer<sup>+</sup> with *S. cerevisiae*  
250 *XRN1* produced an average kill zone that covered 0.68 cm<sup>2</sup> (n = 14). However,  
251 transformation with *XRN1* from *S. mikatae*, *S. bayanus*, or *S. kudriavzevii* produced  
252 significantly larger kill zones covering 0.92 cm<sup>2</sup> (n = 11), 0.96 cm<sup>2</sup> (n = 17) and 0.97 cm<sup>2</sup>  
253 (n = 17), respectively. The kill zone produced by *xrn1* $\Delta$ L-A<sup>+</sup> Killer<sup>+</sup> yeast expressing *S.*  
254 *cerevisiae* *XRN1* was significantly smaller than those produced by yeast expressing any  
255 of the other *XRN1* ortholog (Tukey–Kramer test, p<0.05) (Figs 2D). The smaller kill  
256 zones in the strain expressing *S. cerevisiae* *XRN1* are consistent with lower levels of  
257 killer and L-A derived RNAs. In summary, this assay also supports a species-specific  
258 restriction phenotype for *XRN1*.

259

260 It has been observed that over-expression of *XRN1* can cure *S. cerevisiae* of the  
261 L-A virus, presumably by degrading viral RNA so effectively that the virus is driven to  
262 extinction [8,28]. Therefore, we developed a third assay to test the ability of *XRN1*  
263 orthologs to control L-A, in this case by assessing their ability to cure *S. cerevisiae* of the

264 virus. Plasmids expressing HA-tagged and untagged Xrn1p were transformed into a  
265 killer strain of *S. cerevisiae* with its genomic copy of *XRN1* intact. This was followed by  
266 the analysis of more than 100 purified clones for virus curing, that is, the absence of the  
267 killer phenotype as indicated by the loss of a kill zone when plated on a lawn of sensitive  
268 yeast. Importantly, the introduction of an empty plasmid fails to produce any cured  
269 clones (n = 103) (Figs 3A and 3B). Provision of an additional copy of *S. cerevisiae* *XRN1*  
270 cured 49% of clones (n = 159) (Figs 3A and 3B). Cured clones remained cured (i.e. non-  
271 killers) when purified and tested again for their ability to kill sensitive yeasts (n = 20).  
272 Over-expression of *XRN1* from *S. mikatae*, *S. kudriavzevii*, and *S. bayanus* was unable  
273 to efficiently cure the killer phenotype, resulting in only 12% (n = 129), 8% (n = 120), and  
274 9% (n = 123) cured clones, respectively (Fig 3A, blue bars). The loss of L-A from cured  
275 strains was also verified by RT-PCR. We detected no L-A or killer RNAs within the four  
276 cured clones analyzed (Fig 3C). These data show that *XRN1* from all *Saccharomyces*  
277 species have the ability to cure the killer phenotype, however, *XRN1* from *S. mikatae*, *S.*  
278 *kudriavzevii*, and *S. bayanus* is considerably less efficient than *S. cerevisiae* *XRN1*.  
279 Taken together, we show that viral restriction by *XRN1* is species-specific. These data  
280 contradict a model where viral restriction is merely incidental to the RNA quality control  
281 functions of *XRN1*, but is rather something that can be refined through sequence  
282 evolution in *XRN1*.

283

284 **Fig 3. *XRN1* orthologs vary in their ability to cure *S. cerevisiae* of the L-A**  
285 **and killer viruses** (A) Killer *S. cerevisiae* strains over-expressing Xrn1p  
286 orthologs (with or without C-terminal HA tag) were assayed for loss of the killer  
287 phenotype resulting in “cured” clones. The percentage of cured clones is  
288 indicated. (B) Representative data from 16 clonal isolates either not expressing  
289 (*left*) or expressing *XRN1* from *S. cerevisiae* (*right*), with the lack of kill zone  
290 indicating a cured clone. (C) Non-quantitative RT-PCR was used to confirm the  
291 loss of L-A and killer RNAs from strains deemed to have lost the killer phenotype  
292 from Fig 3A and 3B, compared to the parental uncured strain (L-A<sup>+</sup> Killer<sup>+</sup>) and *S.*  
293 *cerevisiae* BY4741 (L-A<sup>+</sup> Killer<sup>-</sup>).  
294

295 ***XRN1* cellular function has been conserved in *Saccharomyces* species.**

296 We next tested the presumption that the *XRN1* orthologs are functionally  
297 equivalent for cellular processes when expressed within *S. cerevisiae*. We first  
298 confirmed that *XRN1* orthologs successfully complemented the severe growth defect of  
299 *S. cerevisiae xrn1Δ*, by measuring the doubling time of *S. cerevisiae xrn1Δ* with or  
300 without a complementing *XRN1*-containing plasmid (Fig 4A). The knockout of *XRN1* also  
301 renders cells sensitive to the microtubule-destabilizing fungicide benomyl [54], and we  
302 observed that all *XRN1* homologs convey equal resistance to benomyl on solid medium  
303 (Fig 4B). It has been previously reported that over-expression of *XRN1* is toxic to *S.*  
304 *cerevisiae*, a phenotype that has been suggested to be due to a dominant negative  
305 interaction of Xrn1p with other essential cellular components, such as the decapping  
306 complex [54]. Growth upon medium containing 2% galactose was equivalently reduced  
307 for strains carrying *GAL1* inducible *XRN1* genes from each species, whereas the strain  
308 over-expressing *GFP* grew normally (Fig 4C, right). Finally, the Ty1 retrotransposon is  
309 another intracellular virus that replicates within *Saccharomyces* species and often co-  
310 exists with L-A within the same cell. Interestingly, Xrn1p is not a restriction factor for Ty1,  
311 but rather promotes Ty1 replication [35-42]. We found no significant difference between  
312 the mean values for retrotransposition in the presence of Xrn1p from *S. cerevisiae*, *S.*  
313 *mikatae*, *S. kudriavzevii*, or *S. bayanus* (one-way ANOVA,  $F_{3, 8}=0.36$ ,  $p=0.78$ ), indicating  
314 that the evolutionary differences between divergent *XRN1* genes do not affect the ability  
315 of Ty1 to replicate within *S. cerevisiae* (Fig 4D). Collectively, these data indicate the  
316 cellular functions of Xrn1p have remained unaffected during yeast speciation, while the  
317 interaction with L-A viruses has changed.

318

319 **Fig 4. *XRN1* has conserved its housekeeping functions during**  
320 ***Saccharomyces* speciation** (A) The doubling time of *S. cerevisiae xrn1Δ* with

321 and without complementation of *XRN1* from different species of *Saccharomyces*  
322 (error bars represent SEM, n = 3). Below are representative pictures of the  
323 growth and morphology of individual colonies. (B) The growth and benomyl  
324 sensitivity of *S. cerevisiae xrn1Δ* cultured on YPD solid medium, and the effect  
325 of complementation with *XRN1* from different species of *Saccharomyces*. (C)  
326 The effect of over-expression of each *XRN1* ortholog on the growth of *S.*  
327 *cerevisiae* upon solid medium, compared to the over-expression of *GFP*. Cells  
328 are grown on medium containing either raffinose or galactose as the sole carbon  
329 source to control the activity of the *GAL1* promoter. (D) Ty1 retrotransposition  
330 within *S. cerevisiae xrn1Δ* complemented by *XRN1* from different species,  
331 relative to *XRN1* from *S. cerevisiae*. All error bars represent SEM, n>3.  
332

### 333 **Signatures of positive selection in *XRN1* correlate with a region important for L-** 334 **A antagonism**

335 We next mapped the region responsible for the species-specific restriction by  
336 *XRN1*. To better understand the structural organization of Xrn1p from *S. cerevisiae*, we  
337 used Phyre [58] to generate a template-based homology model of the exonuclease  
338 using the solved structure of *Kluyveromyces lactis* Xrn1p (Fig 5A). A linker region within  
339 the N-terminal domain, the far C-terminal domain, and domain D2 were not included in  
340 the model as there is a lack of information regarding the structural organization of these  
341 regions. Importantly, modeled portions contained three of the residue positions that we  
342 identified as evolving under positive selection (Table S1) and all of these (blue) fall in  
343 and near the D1 domain (orange) (Fig 5A). As expected because of the selection that  
344 has operated on them, these residue positions under positive selection are more  
345 variable in sequence between species than are surrounding residues (two are shown in  
346 Fig 5B). All residues under positive selection are surface exposed and are far from the  
347 highly conserved Xrn1p catalytic domain (96% identity, across the *Saccharomyces*  
348 genus) and catalytic pocket (red). The other sites of positive selection fall within the last  
349 500 amino acids of Xrn1p, which is less conserved compared to the rest of the protein  
350 (83% identity, across the *Saccharomyces* genus) (Fig. 5C).

351

352 **Fig 5. A structured protein domain within Xrn1p is responsible for species-**  
353 **specific antiviral activity** (A) Space-filled structural model of *S. cerevisiae*  
354 Xrn1p generated by Phyre analysis [58]. The D1 domain is colored orange.  
355 Amino acids 354–503, 979–1109, and 1240-1528 are unresolved in the model  
356 due to a lack of structural information. The structural model is included as File  
357 S1. (B) A representative amino acid alignment shows two variable sites within the  
358 Xrn1p D1 domain that are predicted to be evolving under positive selection. (C) A  
359 linear diagram of *S. cerevisiae* Xrn1p based on the structure of *K. lactis* Xrn1p,  
360 indicating select domains of the C-terminus and showing the conservation of  
361 Xrn1p across *Saccharomyces* species. The white domain has an unknown  
362 structure and is predicted to be unstructured by Phyre analysis [58]. Triangles  
363 indicate the position of sites deemed to be under positive selection by four site-  
364 based models of molecular evolution, PAML M8 (red), REL (black), FEL (white),  
365 and MEME (green). See Table S1 for a list of all sites. The seven residues that  
366 form the catalytic pocket of Xrn1p are shown as vertical dotted lines within the N-  
367 terminal domain. (D) (*Left*) Chimeric proteins derived from the fusion of domains  
368 of Xrn1p from *S. cerevisiae* (white) and *S. kudriavzevii* (black). Relevant domains  
369 within Xrn1p are colored according to Chang *et al.* (D1 (orange) 731-914; D2  
370 (green), 915-960 and 1134-1151; D3 (magenta); 978-1108) [59]. (*Right*) Clonal  
371 isolates of a killer *S. cerevisiae* strain expressing chimeric Xrn1p were assayed  
372 for their ability to cure the killer phenotype from *S. cerevisiae* (error bars  
373 represent SEM, n>3).  
374

375 To define the importance of the two regions that we identified as containing  
376 signatures of positive selection, we replaced portions of *S. kudriavzevii* *XRN1* with the  
377 equivalent portions of *S. cerevisiae* *XRN1*, and assayed for a region of *S. cerevisiae*  
378 *XRN1* that would convey the ability to cure the killer phenotype. We found that an *XRN1*  
379 chimera encoding the last 775 amino acids from *S. cerevisiae* (Sc-775) was sufficient to  
380 cure 56% of clones analyzed, and this was very similar to *S. cerevisiae* *XRN1* (57%) (Fig  
381 5D). Conversely, when the last 777 amino acids from *S. kudriavzevii* (Sk-777) were  
382 used to replace the same region within *S. cerevisiae* *XRN1*, only 9% of clones were  
383 cured (Fig S3). This focused our construction of further chimeras to the second half of  
384 the protein, which also contains all of the codons under positive selection and has less  
385 amino acid conservation between *S. cerevisiae* and *S. kudriavzevii* (82% protein identity,  
386 compared to the N-termini of Xrn1p with 95% identity).

387

388 Initial analysis of the highly diverged C-terminal tail revealed that the last 461  
389 amino acids of *S. cerevisiae* Xrn1p were unable to convey efficient L-A restriction to *S.*  
390 *kudriavzevii* Xrn1p (Fig S3). For this reason, we focused further chimeric analysis on the  
391 region encompassing the D1-D3 domains (Fig 5A-C), as defined previously [59]. We  
392 swapped into *S. kudriavzevii* Xrn1p the D2-D3, D1, or D1-D3 domains of *S. cerevisiae*  
393 Xrn1p, and saw increasing rescue of the ability to cure the L-A virus (Fig 5D). All  
394 chimeric *XRN1* genes were functionally equivalent with respect to their cellular functions,  
395 as all were able to establish normal growth and benomyl resistance in *S. cerevisiae*  
396 *xrn1Δ* (Fig S4). Therefore, the species-specificity domain maps predominantly to D1,  
397 with contribution from the neighboring D2 and D3 domains as well. Together, our data  
398 suggest that the exonuclease activity of Xrn1p is important for virus restriction and is  
399 preserved across species, but that evolution has tailored a novel virus interaction  
400 domain (D1-D3) that targets the enzymatic activity of Xrn1p against L-A in a manner that  
401 changes over time, keeping step with virus evolution.

402

#### 403 **Xrn1p physically interacts with the L-A virus Gag proteins.**

404

405 It's hard to imagine that Xrn1p proteins from different species are differentially  
406 recognizing viral RNA, since they all retain their host functionalities in RNA degradation.  
407 We considered the possibility that there might be host-virus interactions beyond Xrn1p  
408 and the viral RNA. It has been shown that Xrn1p targets uncapped viral RNA transcripts  
409 rather than affecting dsRNA propagation [57]. As totivirus transcription only occurs in  
410 the context of a fully-formed capsid [60] and capsids are assembled entirely from the L-A  
411 Gag protein [61], it would seem plausible that Xrn1p may interact directly with Gag to  
412 target virus-derived uncapped RNAs. We introduced epitope tags onto Xrn1p (HA-tag)

413 and the major capsid protein of L-A, Gag (V5-tag), and expressed both tagged and  
414 untagged versions of each protein from plasmids introduced into *S. cerevisiae xrn1Δ* (Fig  
415 6A). Bead-bound antibodies specific for either HA or V5 were used to  
416 immunoprecipitate Xrn1p or Gag, respectively. We found that Gag (V5-tagged) was able  
417 to immunoprecipitate Xrn1p (HA-tagged) from *S. cerevisiae* and *S. kudriavzevii* (Fig 6A,  
418 top panel). Reciprocally, Xrn1p-HA from both *S. cerevisiae* and *S. kudriavzevii* were able  
419 to immunoprecipitate Gag-V5 (Fig 6A, bottom panel). The interaction between Xrn1p  
420 and Gag appears not to be mediated by single-stranded RNAs, as their digestion by  
421 RNase A in the whole cell extract did not affect the co-immunoprecipitation of Gag by  
422 Xrn1p (Fig S5). We next performed these experiments with a monoclonal antibody  
423 specific to L-A Gag, so that endogenous L-A Gag protein could be immunoprecipitated.  
424 This reaction co-immunoprecipitated both *S. cerevisiae* and *S. kudriavzevii* Xrn1p (Fig  
425 6B). Qualitatively, the relative efficiencies of Gag interaction with both *S. cerevisiae* and  
426 *S. kudriavzevii* Xrn1p appear similar in all assays, which seems at odds with our model  
427 that suggests that evolutionary differences within Xrn1p are a direct determinant of  
428 totivirus interaction. There are several possible interpretations. First, Gag might be  
429 antagonizing Xrn1p rather than being the species-specific target of Xrn1. Second, there  
430 may be a third component in this interaction which makes manifest the species-  
431 specificity of Xrn1p. Finally, a trivial explanation could be that coimmunoprecipitations  
432 are not very quantitative, and maybe there is in fact a difference in interaction with Gag  
433 between the Xrn1p of different species. Nonetheless, these data demonstrate a  
434 previously undescribed interaction that goes beyond Xrn1p interaction with viral RNA  
435 and warrants careful *in vitro* study.

436

437 **Fig 6. The totivirus structural protein Gag is associated with Xrn1p *in vivo*.**  
438 Western blot analysis of Xrn1p and L-A Gag co-immunoprecipitation. (A) (Top)  
439 V5-tagged and untagged Gag proteins were immunoprecipitated in the presence



440 of Xrn1p-HA from either *S. cerevisiae* or *S. kudriavzevii*. (Bottom) HA-tagged and  
441 untagged Xrn1p from either *S. cerevisiae* or *S. kudriavzevii* were  
442 immunoprecipitated in the presence of Gag-V5. (B) Native, untagged, virus  
443 encoded L-A Gag was immunoprecipitated in the presence of Xrn1p-HA from  
444 either *S. cerevisiae* or *S. kudriavzevii* using beads with (+Ig) or without (-Ig) anti-  
445 Gag antibody present. Adh1p was used in all panels as a loading control to  
446 ensure equal input of total protein and the specificity of immunoprecipitation.  
447

448 **Confirmation of the species-specific restriction of Xrn1p using a newly**  
449 **described totivirus from *S. kudriavzevii*.**

450

451 We next wished to test our findings against other related yeast viruses. Indeed,  
452 the *S. cerevisiae* totivirus L-A-lus has been shown to have limited susceptibility to *XRN1*  
453 from a different strain of *S. cerevisiae* [28]. We also wanted to test viruses of other  
454 species, but the only fully characterized totiviruses within the *Saccharomyces* genus are  
455 from *S. cerevisiae*. To identify totiviruses of other species, we screened *Saccharomyces*  
456 species from the *sensu stricto* complex for the presence of high molecular weight viral  
457 RNA species, and discovered a ~4.6 kbp dsRNA molecule within *S. kudriavzevii*  
458 FM1183 isolated from Europe (Fig 7A) [46]. We cloned the 4.6 kbp dsRNA molecule  
459 using techniques described by Potgieter *et al.* [62] and sequenced the genome of the  
460 virus using Sanger sequencing. We named the virus SkV-L-A1 (*S. kudriavzevii* virus L-A  
461 isolate number 1; Genbank accession number: KX601068). The SkV-L-A1 genome was  
462 found to be 4580 bp in length, with two open reading frames encoding the structural  
463 protein Gag and the fusion protein Gag-Pol (via a -1 frameshift) (Fig 7B). Conserved  
464 features of totiviruses were identified and include the conserved catalytic histidine  
465 residue required for cap-snatching (H154), a -1 frameshift region, packaging signal, and  
466 replication signal (Figs 7B and S6). Phylogenetic analysis of the Gag and Pol nucleotide  
467 and protein sequences firmly places SkV-L-A1 within the clade of *Saccharomyces*

468 totiviruses represented by L-A and L-A-lus [28,63], as opposed to the more distantly  
469 related *Saccharomyces* totivirus L-BC (Fig 7C) [64].

470

471 **Fig 7. The description of a novel totivirus from *S. kudriavzevii* and its**  
472 **unique sensitivity to restriction by Xrn1p from its cognate host species.**

473 (A) dsRNA extraction from different species of *Saccharomyces* yeasts including  
474 *S. cerevisiae* (BY4741), *S. mikatae* (JRY9181), *S. kudriavzevii* (FM1183), and *S.*  
475 *bayanus* (JRY8153). The major product of the extraction method is a single ~4.6  
476 kbp dsRNA species, as shown by agarose gel electrophoresis. (B) A schematic  
477 representation of the genome organization of the totivirus SkV-L-A1 from *S.*  
478 *kudriavzevii*. H154 represents the conserved catalytic histidine used for totivirus  
479 cap-snatching [14]. (C) The evolutionary relationship of SkV-L-A1 to known  
480 totiviruses was inferred by using the Maximum Likelihood method with bootstrap  
481 values from 100 replicates shown at each node. The nucleotide sequence of the  
482 *POL* gene was aligned from six totiviruses (GenBank accession numbers: SkV-L-  
483 A1 (this study; KX601068), L-A-lus (JN819511), L-A (NC\_003745), tuber  
484 aestivum virus 1 (TAV1) (HQ158596), black raspberry virus F (BRVF)  
485 (NC\_009890), L-BC (NC\_001641)). The tree is drawn to scale, with branch  
486 lengths measured in the number of substitutions per site. The exact phylogenetic  
487 relationship of the “L-A-like” viruses is somewhat ambiguous due to low bootstrap  
488 support within the clade (Fig S6). (D) *S. kudriavzevii* was used to express HA-  
489 tagged *XRN1* from different *Saccharomyces* yeasts (*S. cer* – *S. cerevisiae*; *S.*  
490 *mik* – *S. mikatae*; *S. kud* – *S. kudriavzevii*; *S. bay* – *S. bayanus*), with their  
491 expression measured by Western blotting, relative to the expression of *ADH1*.  
492 (E) Relative abundance of SkV-L-A1 RNAs when *XRN1* from different  
493 *Saccharomyces* species are over-expressed within *S. kudriavzevii*, as  
494 determined by RT-qPCR. The asterisk represents a p-value of <0.05 (Tukey-  
495 Kramer test).  
496

497 To test the effect of *XRN1* upon SkV-L-A1, plasmids expressing *XRN1* orthologs

498 were introduced via LiAc transformation into *S. kudriavzevii* infected with SkV-L-A1.

499 These plasmids were able to express *XRN1* from each species, although we find that

500 the expression is variable with *S. mikatae* Xrn1p expressing at the a level higher than

501 the others (Fig 7D). The expression of these proteins did not affect the overall growth

502 rate or colony morphology of *S. kudriavzevii* (Fig. S7). Because of the lack of an

503 observable killer phenotype in this strain (likely because a killer toxin-encoding satellite

504 dsRNA is not present), heterospecific *XRN1* were expressed within *S. kudriavzevii* and

505 analyzed for their ability to spontaneously cure SkV-L-A1, as we did previously with L-A

506 in *S. cerevisiae* (Fig 3). We did not observe any virus curing by any orthologs of Xrn1p,  
507 but believe that this could be because the high-copy plasmids that we used in this  
508 experiment in *S. cerevisiae* are unable to drive Xrn1p expression in *S. kudriavzevii* high  
509 enough to actually cure the virus. However, we have observed previously that Xrn1p can  
510 reduce the abundance of totivirus RNAs (Fig 2A), so we further analyzed the *XRN1*-  
511 transformed clones of *S. kudriavzevii* for changes in SkV-L-A1 RNA levels using reverse  
512 transcriptase quantitative PCR (RT-qPCR). Total RNA was extracted from clones of *S.*  
513 *kudriavzevii* and converted to cDNA using random hexamer priming. cDNA samples  
514 were amplified using primers designed to specifically target SkV-L-A1 GAG and the  
515 cellular gene *TAF10*. The empty vector control was used as the calibrator sample, and  
516 *TAF10* expression was used as the normalizer to calculate the relative amount of SkV-L-  
517 A1 RNAs present within each *XRN1* expressing *S. kudriavzevii* cell line using the  
518 comparative  $C_T$  method [65]. We found that expression of *XRN1* from *S. kudriavzevii* ( $n$   
519 = 10) reduced the relative levels of SkV-L-A1 RNAs by 40% (Fig 7E), even though this  
520 Xrn1p was expressed at the lowest levels (Fig 7D). This is in contrast to *XRN1* from *S.*  
521 *mikatae* ( $n = 9$ ) and *S. bayanus* ( $n = 8$ ) that only showed a 13% increase or 15%  
522 decrease in SkV-L-A1 RNAs, respectively. *S. cerevisiae* *XRN1* was able to reduce SkV-  
523 L-A1 RNAs by 27% and is noteworthy due to the close evolutionary relationship between  
524 SkV-L-A1 and other L-A-like viruses from *S. cerevisiae* (Fig S6). These data suggest  
525 that Xrn1p is a species-specific restriction factor in different *Saccharomyces* yeasts, and  
526 that coevolution of totiviruses and yeasts has specifically tailored the potency of Xrn1p to  
527 control the replication of resident viruses within the same species.

528

## 529 Discussion

530 In the *Saccharomyces* genus, Xrn1p, the SKI complex, and exosome are all  
531 important for controlling the abundance of totivirus RNAs. We find that *XRN1* and the  
532 exosome component *RRP40* are somewhat unique in their strong signatures of positive  
533 natural selection. We speculated that positive selection might be driven by selection  
534 imposed by totiviruses. As speciation occurs and viruses mutate in unique ways in each  
535 lineage, new allelic versions of these antiviral genes that enable better control of totivirus  
536 replication would experience positive natural selection. Indeed, we found this to be the  
537 case, with *S. cerevisiae* Xrn1p restricting the *S. cerevisiae* L-A virus better than any  
538 other ortholog of *XRN1*, and *S. kudriavzevii* Xrn1p restricting *S. kudriavzevii* SkV-L-A1  
539 virus the best. The exact nature of the host-virus protein-protein interaction that is driving  
540 this evolutionary arms race is not clear. To thwart *XRN1*, the totiviruses are known to  
541 synthesize uncapped RNAs with an exposed 5' diphosphate, which is a suboptimal  
542 substrate for Xrn1p-mediated decay [24]. Further, it has been shown that the totivirus  
543 Gag protein has a cap-snatching activity that cleaves off caps from host mRNAs and  
544 uses them to cap viral transcripts, protecting them from Xrn1p degradation [12,14]. We  
545 have found that Xrn1p interacts with L-A Gag, and that this interaction is not mediated by  
546 the presence of single-stranded RNAs. What remains unknown is whether Xrn1p is  
547 targeting Gag as part of the restriction mechanism, or whether Gag is targeting Xrn1p as  
548 a counter defense. As we did not observe an obvious species-specific differences in the  
549 interaction between Xrn1p and L-A Gag by coimmunoprecipitation, we cannot clearly  
550 define the observed role of sequence variation in Xrn1p. This may be because of the  
551 low sensitivity of our assay system, or because direct binding of Xrn1p by L-A Gag is  
552 ubiquitous and that the rapid evolution of *XRN1* results from another intriguing facet of  
553 virus-host interaction and antagonism. However, we now know that the interaction

554 between L-A and Xrn1p goes beyond the simple recognition of L-A RNA by Xrn1p. We  
555 can speculate that Xrn1p may compete with Gag for access to uncapped viral RNAs as  
556 they are extruded into the cytoplasm, or that interaction with unassembled Gag allows  
557 the recruitment of Xrn1p to sites of virion assembly resulting in viral RNA degradation.  
558 Alternately, it is possible that the target of Xrn1p is simply L-A RNA, and that the  
559 interaction with Gag reflects a viral countermeasure where Gag is redirecting or  
560 otherwise altering the availability of Xrn1p to degrade L-A RNA. Indeed, there are  
561 several examples of mammalian viruses that redirect or degrade Xrn1p to aid in their  
562 replication [17,18,66].

563

564 The literature suggests that Xrn1p is a widely-utilized restriction factor against  
565 viruses, as it has been reported to have activity against mammalian viruses [9,16], yeast  
566 viruses [8,24], and plant viruses [53]. The potent 5'-3' exonuclease activity of Xrn1p has  
567 resulted in viruses developing a rich diversity of strategies to protect their RNAs. For  
568 instance, Hepatitis C virus recruits MiR-122 and Ago2 to its 5' UTR to protect its RNA  
569 genome from Xrn1p degradation [7,16]. The yeast single-stranded RNA narnavirus uses  
570 a different strategy to protect its 5' terminus, folding its RNA to form a stem-loop  
571 structure that prevents Xrn1p degradation [8]. In some cases, viruses even depend on  
572 Xrn1p to digest viral RNA in a way that benefits viral replication, for example, preventing  
573 the activation of innate immune sensors [49]. Flavivirus (West Nile and Dengue virus)  
574 genomes also encode RNA pseudoknot and stem-loop structures that arrest the  
575 processive exonuclease activity of Xrn1p, producing short subgenomic flavivirus RNAs  
576 (sfRNAs) that are important for viral pathogenicity [13,67]. Members of the *Flaviviridae*,  
577 *Herpesviridae*, *Coronaviridae*, and yeast *Totiviridae* have all been shown to encode  
578 proteins that initiate endonucleolytic cleavage of host mRNAs, revealing exposed 5'  
579 monophosphates that are substrates for Xrn1p degradation. This is thought to interfere

580 with host translation and to produce uncapped RNA “decoys” that potentially redirect  
581 Xrn1p-mediated degradation away from viral RNA [14,15]. Xrn1p degradation, Xrn1p  
582 relocalization, virus-encoded capping enzymes, cap-snatching mechanisms, RNA-  
583 protein conjugation, recruitment of host micro-RNAs, cleavage of host mRNAs as  
584 “decoys”, and viral RNA pseudoknots are all utilized to prevent Xrn1p-mediated viral  
585 RNA destruction [7,8,12-18]. All of this evidence suggests that viruses can employ  
586 various methods to escape or harness the destructive effects of Xrn1. Our data now  
587 suggests that Xrn1p in yeast is not a passive player in the battle against viruses, but  
588 rather that hosts can be selected to encode new forms of Xrn1p that can overcome viral  
589 strategies.

590

591 To rationalize the model of an antagonistic relationship between L-A and  
592 *Saccharomyces* species, it is important to consider the fitness burden of strictly  
593 intracellular viruses. Prevailing wisdom assumes that infection of fungi by viruses is  
594 largely asymptomatic and benign, especially when considering that their intracellular  
595 lifecycle ensures an evolutionary dead-end if they kill or make their host unfit. Indeed,  
596 within laboratory yeast strains, the association between L-A and *S. cerevisiae* appears to  
597 be at equilibrium, with no major biological differences between strains infected or not  
598 infected by L-A [68]. Therefore, the relationship between L-A and the *Saccharomyces*  
599 yeasts could be viewed as mutualistic or even commensalistic [68-70]. Mutualism is  
600 particularly striking in the context of the L-A / killer virus duo that provides the host cell  
601 with the “killer” phenotype, a characteristic that is broadly distributed throughout fungi  
602 [71]. If an infected yeast cell can kill other yeasts around it using the killer toxin, it no  
603 longer has to compete for resources within that environmental niche, an evolutionarily  
604 advantageous situation [56,69,70]. Indeed, there are other examples of host-virus  
605 mutualism in fungi [72,73]. However, there are many observations that lead one to

606 believe that the relationship between intracellular viruses and their hosts is not benign  
607 and static. Firstly, there is a measurable fitness cost to killer toxin production by *S.*  
608 *cerevisiae* within unfavorable environmental conditions that inactivate the toxin, allow for  
609 regular cellular dispersal and/or are nutrient rich [69,70]. Secondly, virus infection of  
610 pathogenic fungi can also cause hypovirulence (a reduction in fungal pathogenesis), an  
611 outcome that is being exploited to treat agricultural disease [74-77]. Thirdly, many wild  
612 and domesticated strains of *S. cerevisiae* are free of totiviruses (and therefore also of  
613 killer), suggesting that there is selection against the ongoing maintenance of these  
614 viruses [20,28,71]. Fourthly, the continued maintenance of RNAi systems in fungi also  
615 correlates with the loss of the killer phenotype and is known to antagonize fungal viruses  
616 [71,78]. However, a virus of the fungi *Cryphonectria parasitica* has been shown to  
617 antagonize and escape restriction by RNAi without crippling its host [78]. This  
618 antagonistic relationship appears similar to the equilibrium of *Saccharomyces* yeasts  
619 and totiviruses, and suggests that in the absence of effective RNAi, additional antiviral  
620 defenses may be biologically relevant (i.e. Xrn1p). In line with this view of a dynamic  
621 relationship between hosts and intracellular viruses, we show that totiviruses from  
622 different *Saccharomyces* species are best controlled by the Xrn1p of their cognate  
623 species, and that disruption of this equilibrium can result in excessive virus replication  
624 (Fig 2), virus loss (Fig 3), or a reduction in viral RNA (Fig 2 and Fig 7). Signatures of  
625 positive selection that we have detected in *Saccharomyces XRN1* are also consistent  
626 with a host-virus equilibrium that is in constant flux due to the dynamics of a back-and-  
627 forth evolutionary conflict (Fig 2 and Fig 6).

628

629         There are several examples of mammalian housekeeping proteins engaged in  
630 evolutionary arms races with viruses. (By “housekeeping” we refer to proteins making  
631 critical contributions to host cellular processes, as opposed to proteins dedicated to

632 immunity.) In most of these other examples though, the housekeeping protein is hijacked  
633 by viruses to assist their replication in the cell (rather than serving to block viral  
634 replication). For instance, many viruses hijack cell surface receptors to enter cells. We  
635 and others have shown that entry receptors are quite evolutionarily plastic, and that  
636 mutations can reduce virus entry without compromising host-beneficial functions of the  
637 receptor [33,79-83]. For example, the antagonistic interaction of Ebola virus (and/or  
638 related filoviruses) with the bat cell surface receptor, Niemann-Pick disease, type C1  
639 (NPC1), has driven the rapid evolution of the receptor without affecting the transport of  
640 cholesterol, critical to the health of the host [33]. Numerous such examples highlight how  
641 essential housekeeping machineries, not just the immune system, are critical for  
642 protecting the cell from replicating viruses. This study highlights an interesting  
643 evolutionary conundrum that does not apply to classical immunity genes: as Xrn1p  
644 appears to be an antiviral protein, it must be able to evolve new antiviral specificities  
645 without compromising cellular health and homeostasis.

646

## 647 **Materials and Methods**

### 648 **Plasmid construction**

649 *XRN1* from *S. cerevisiae*, including 1000 bp of the 5' and 3' UTRs, was amplified by  
650 PCR from genomic DNA prepared from *S. cerevisiae* S288C. This PCR product was  
651 cloned into the plasmid pAG425-GAL-*ccdB* by the “yeast plasmid construction by  
652 homologous recombination” method (recombineering) [84] to produce pPAR219. Briefly,  
653 pAG425-GAL-*ccdB* was amplified by PCR to produce a 5000 bp product lacking the  
654 *GAL-1* gene and the *ccdB* cassette. The PCR primers used to amplify pAG425-GAL-  
655 *ccdB* contained additional DNA sequence with homology to the UTRs of *XRN1* from *S.*



656 *cerevisiae*. Both PCR products were used to transform BY4741, with correctly  
657 assembled plasmids selected for by growth on complete medium (CM) –leucine. The  
658 *XRN1* open reading frame (HA-tagged and untagged) from *S. mikatae*, *S. bayanus*, or *S.*  
659 *kudriavzevii* was introduced into pPAR219 between the 5' and 3' UTRs from *S.*  
660 *cerevisiae* *XRN1* using recombineering to produce pPAR225, pPAR226, and pPAR227,  
661 respectively. As a negative control, *NUP133* was cloned into the pPAR219 plasmid  
662 backbone to produce pPAR221, which was used to allow growth of *xrn1* $\Delta$  on medium  
663 lacking leucine without *XRN1* complementation. The *LEU2* gene was replaced by *TRP1*  
664 using recombineering techniques to produce the plasmids pPAR326, pPAR327,  
665 pPAR328, and pPAR329. Using PCR and recombineering, we also constructed  
666 chimeric *XRN1* genes by exchanging regions of *S. kudriavzevii* *XRN1* (pPAR227) with  
667 the corresponding regions of *S. cerevisiae* *XRN1* (pPAR219). *XRN1* inducible plasmids  
668 were constructed by cloning PCR-derived *XRN1* genes into pCR8 by TOPO-TA cloning  
669 (Thermo Fisher). Utilizing Gateway™ technology (Thermo Fisher), *XRN1* genes were  
670 sub-cloned into the destination vector pAG426-GAL-*ccdB* for over-expression studies  
671 [85]. The same pCR8/Gateway workflow was also used to clone and tag GAG from a  
672 cDNA copy of the L-A totivirus (pI2L2) to produce pPAR330 and pPAR331. The DNA  
673 sequences from all constructed plasmids can be found in File S2.

674

### 675 **Yeast strain construction**

676 The *S. cerevisiae* killer strain (BJH001) was created by the formation of a heterokaryon  
677 from the mating of the haploid strains BY4733 (*KAR1*) and 1368 (*kar1*) [86]. The  
678 resultant daughter heteroplasmon cells were selected by growth on CM –uracil and the  
679 ability to produce zones of growth inhibition indicative of the presence of L-A and the  
680 killer virus. The inability to grow on CM lacking histidine, leucine, tryptophan or

681 methionine was also used to confirm the genotype of BJH001. BJH006 was created by  
682 replacing *XRN1* with the *KANMX4* gene using homologous recombination within BJH001  
683 [87].

684

#### 685 **Rapid extraction of viral dsRNA from *Saccharomyces cerevisiae***

686 1 x 10<sup>9</sup> yeast cells (~10 mL) were harvested from a 24-48 h overnight culture grown to  
687 saturation. Strains of *S. kudriavzevii* and *S. mikatae* were grown at room temperature,  
688 all other strains were grown at 30°C. The flocculent nature of some strains of wild  
689 yeasts made it challenging to accurately determine the exact number of cells present in  
690 some cultures. In these cases, the size of the cell pellet was used as an approximate  
691 measure of cell number relative to *S. cerevisiae*. Harvested cells were washed with  
692 ddH<sub>2</sub>O, pelleted, and washed with 1 ml of 50 mM EDTA (pH 7.5). Cells were again  
693 harvested and the pellets suspended by vortexing in 1 ml of 50 mM TRIS-H<sub>2</sub>SO<sub>4</sub>  
694 (pH9.3), 1% β-mercaptoethanol (added fresh), and incubated at room temperature for 15  
695 min. The cell suspension was centrifuged and the supernatant removed and the cell  
696 pellet suspended in 1 ml of BiooPure-MP (a single-phase RNA extraction reagent  
697 containing guanidinium thiocyanate and phenol) (Bioo Scientific) and vortexed  
698 vigorously. 200 μl of chloroform was added and vortexed vigorously before incubation for  
699 5 min at room temperature. The aqueous phase and solvent phase were separated by  
700 centrifugation at 16,000 x g for 15 min at 4°C. The aqueous phase was transferred to a  
701 new tube and 1/3 volume of 95-100% ethanol added and mixed well by vortexing. The  
702 entire sample was loaded onto a silica filter spin column (Qiagen plasmid miniprep kit)  
703 and centrifuged for 30 s at 16,000 x g. The flow-through was discarded and the column  
704 washed twice with 750 μl of 100 mM NaCl/75% ethanol by centrifugation at 16,000 x g  
705 for 30 sec. The column was dried by centrifugation at 16,000 x g for an additional 30

706 sec. The dsRNA was eluted from the column by the addition of 100  $\mu$ l of 0.15 mM EDTA  
707 (pH 7.0) and incubation at 65°C for 5 min before centrifugation at 16,000 x g for 30 sec.

708

### 709 **Detection of L-A by RT-PCR**

710 dsRNA that was extracted from  $1 \times 10^9$  yeast cells using our rapid extraction of viral  
711 dsRNA protocol was used as template for superscript two-step RT-PCR (Thermo  
712 Fisher). cDNA was created using a primer specific for the negative strand L-A genomic  
713 RNA – 5' CTCGTCAGCGTCTTGAACAGTAAGC. Primers 5'-  
714 GACGTCCCGTACCTAGATGTTAGGC and 5'-CTCGTCAGCGTCTTGAACAGTAAGC  
715 were used to specifically target and amplify cDNA derived from negative strand L-A virus  
716 RNAs using PCR with Taq (New England Biolabs). The plasmid pI2L2 was used as a  
717 positive control for the RT-PCR reaction as it contains a cDNA copy of the L-A virus  
718 genome [88]. Alternatively, we collected total RNA from  $\sim 1 \times 10^7$  actively growing yeast  
719 cells using the RNeasy total RNA extraction kit (Qiagen) and synthesized cDNA using  
720 primers to target both the positive and negative strand of either L-A (5'-  
721 AAGATATTCGGAGTTGGTGATGACG and 5'-  
722 TCTCCGAAATTTTCCAGACTTTATAAGC) or killer virus (5'-  
723 GCGATGCAGGTGTAGTAATCTTTGG and 5'-AGTAGAAATGTCACGACGAGCAACG).  
724 The same primers were used to detect L-A and killer virus specific cDNAs using PCR  
725 with Taq polymerase (New England Biolabs).

726

### 727 **Ty1 retrotransposition assays**

728 We assayed Ty1 retrotransposition in *S. cerevisiae xrn1* $\Delta$ , using the previously  
729 described Ty1 retrotransposition reporter system [89], and confirmed that *XRN1* deletion  
730 causes a dramatic reduction in Ty1 retrotransposition ( $\sim 50$ -fold) [35]. To test the effect of

731 *XRN1* evolution on Ty1 replication, we introduced *XRN1* from *S. cerevisiae*, *S. mikatae*,  
732 *S. kudriavzevii*, or *S. bayanus* into *xrn1Δ* and assayed Ty1 retrotransposition.

733

#### 734 **Western blot Analysis of Xrn1p**

735 Yeast lysates were prepared using the Y-PER reagent (Thermo Fisher) from 100  $\mu$ l  
736 volume of log-phase yeast cells as per manufacturers instructions or by bead beating as  
737 described previously [90]. HA-tagged Xrn1p was detected via Western blot using a  
738 1:5000 dilution of a horseradish peroxidase conjugated anti-HA monoclonal antibody  
739 (3F10 - # 12013819001) (Roche). Adh1p was detected using a 1:10000 dilution of rabbit  
740 polyclonal anti-alcohol dehydrogenase antibody Ab34680 (Abcam). V5-tagged proteins  
741 were detected using a 1:5000 dilution of a mouse monoclonal antibody (R960-25) (Life  
742 Technologies). Native L-A Gag was detected using a 1:1000 dilution of a mouse  
743 monoclonal antibody (gift from Nahum Sonenberg). Secondary antibodies were  
744 detected using ECL Prime Western Blotting Detection Reagent on a GE system  
745 ImageQuant LAS 4000 (GE Healthcare Life Sciences).

746

#### 747 **Evolutionary analysis**

748 Nucleotide sequences from six species of *Saccharomyces* yeasts were obtained from  
749 various online resources, where available [44,46,91]. Maximum likelihood analysis of  
750 dN/dS was performed with codeml in the PAML 4.1 software package [47]. Multiple  
751 protein sequence alignments were created using tools available from the EMBL  
752 (EMBOSS Transeq and Clustal Omega) ([www.embl.de](http://www.embl.de)). Protein alignments were  
753 manually curated to remove ambiguities before processing with PAL2NAL to produce  
754 accurate DNA alignments [92]. DNA alignments were fit to the NSsites models M7  
755 (neutral model of evolution, codon values of dN/dS fit to a beta distribution, with dN/dS >

756 1 not allowed) and M8 (positive selection model of evolution, a similar model to M7 but  
757 with an additional site class of  $dN/dS > 1$  included in the model). To ensure robustness  
758 of the analysis, two models of codon frequencies (F61 and F3x4) and multiple seed  
759 values for  $dN/dS$  ( $\omega$ ) were used (Table S1). Likelihood ratio tests were performed to  
760 evaluate which model of evolution the data fit significantly better. Posterior probabilities  
761 of codons under positive selection within the site class of  $dN/dS > 1$  (M8 model of  
762 positive selection) were then deduced using the Bayes Empirical Bayes (BEB) algorithm.  
763 REL and FEL analysis was carried out using the online version of the Hyphy package  
764 ([www.datamonkey.org](http://www.datamonkey.org)) Table S1 [48]. Analysis of *XRN1* was performed using the  
765 TrN93 nucleotide substitution model and the following phylogenetic relationship (Newick  
766 format):

767 ((((((*S. paradoxus*-Europe, *S. paradoxus*-Far East), (*S. paradoxus*-North America, *S.*  
768 *paradoxus*-Hawaii)), *S. cerevisiae*), *S. mikatae*), *S. kudriavzevii*), *S. arboricolus*, *S.*  
769 *bayanus*);

770 GARD analysis found no significant evidence of homologous recombination within any  
771 dataset. MEGA6 was used to infer the evolutionary history of totiviruses using the  
772 Maximum Likelihood method. Appropriate substitution models were selected using  
773 manually curated DNA and protein alignments. The tree topologies with the highest log  
774 likelihood were calculated, with all positions within the alignment files containing gaps  
775 and missing data ignored. The reliability of the generated tree topologies was assessed  
776 using the bootstrap test of phylogeny using 100 iterations. Bootstrap values  $>50\%$  are  
777 shown above their corresponding branches.

778

779 **Benomyl sensitivity assay.**

780 YPD plates containing  $15 \mu\text{g ml}^{-1}$  of benomyl were prepared as described previously  
781 [54]. Yeast strains expressing *XRN1* or containing an empty vector were grown  
782 overnight at  $30^{\circ}\text{C}$  in CM –leucine. Cell numbers were normalized and subject to a 10-  
783 fold serial dilution before spotting onto YPD agar plates with or without benomyl, and  
784 grown at  $37^{\circ}\text{C}$  for 72 h.

785

786 **Over-expression of *XRN1* and the effect on cell growth.**

787 *S. cerevisiae* carrying multi-copy plasmids encoding *XRN1* or *GFP* under the control of  
788 the *GAL1* promoter were grown overnight at  $30^{\circ}\text{C}$  in CM –uracil with raffinose as a  
789 carbon source. Cell numbers were normalized and subject to a 10-fold serial dilution  
790 before spotting onto CM –uracil agar plates containing either 2% raffinose or galactose.  
791 Plates were grown at  $30^{\circ}\text{C}$  for 72 h.

792

793 ***Kill zone measurement***

794 Plasmids encoding various *XRN1* genes were used to transform BJH006. Purified single  
795 colonies of killer yeasts were inoculated in 2 ml CM –leucine cultures and grown to mid-  
796 log phase. YPD “killer assay” agar plate supplemented with methylene blue (final  
797 concentration 0.003% w/v) and pH balanced to 4.2 with sodium citrate, were freshly  
798 inoculated and spread with *S. cerevisiae* K12 and allowed to dry. Thereafter,  $1.5 \mu\text{l}$  of  
799 water containing  $6 \times 10^5$  cells was spotted onto the seeded YPD plates and incubated at  
800 room temperature for 72 h. The diameter of the zones of growth inhibition were  
801 measured and used to calculate the total area of growth inhibition.

802

### 803 **Killer phenotype curing assay**

804 The curing of the killer phenotype was measured by transforming *S. cerevisiae* BJH006  
805 with approximately 100 ng of plasmid encoding various *XRN1* genes using the LiAc  
806 method. The addition of 1000 ng or as little as 10 ng of plasmid had no affect on the  
807 percentage of colonies cured using this assay. After 48 h of growth, colonies were  
808 streaked out and grown for a further 48 h. Clonal isolates of killer yeasts were patched  
809 onto a YPD “killer assay” plate (see kill zone measurement protocol) that were  
810 previously inoculated with *S. cerevisiae* K12, and incubated at room temperature for 72  
811 h. The presence or absence of a zone of inhibition was used to calculate the percentage  
812 of killer yeast clones cured of the killer phenotype.

813

### 814 **Xrn1p structural modeling**

815 PHYRE was used to create a template-based homology model of *S. cerevisiae* Xrn1p  
816 using the solved structure of *K. lactis* Xrn1p as a template [58,59]. The structure was  
817 determined with an overall confidence of 100% (36% of aligned residues have a perfect  
818 alignment confidence as determined by the PHYRE inspector tool), a total coverage of  
819 81%, and an amino acid identity of 67% compared to *K. lactis* Xrn1p. PDB coordinates  
820 for the modeled structure can be found in File S1. Structural diagrams were constructed  
821 using MacPyMOL v7.2.3.

822

### 823 **Co-immunoprecipitation of Xrn1p and L-A Gag.**

824 Strains were grown in CM lacking the appropriate amino acids in order to retain the  
825 relevant plasmids. For co-immunoprecipitations involving L-A Gag-V5 and Xrn1p-HA, 50  
826 mL cultures (CM –tryptophan –leucine, 2% raffinose) were used to inoculate 500 mL  
827 cultures (CM –tryptophan –leucine, 2% galactose) at OD<sub>600</sub> ~0.1. Cells were harvested

828 at OD<sub>600</sub> 0.7, after ~14 h of growth at 30°C with shaking. Cultures used for the  
829 immunoprecipitation of native Gag were grown in the same manner, but in CM –leucine  
830 medium containing 2% dextrose. Immunoprecipitation of yeast and viral proteins were  
831 performed as previously described [90] with the following modifications: 2-4 mg of  
832 protein was used per co-immunoprecipitation. Approximately 50 µg of protein was  
833 loaded for the whole-cell extract “input”, as determined by Bradford Assay (~2% of total  
834 input), and was compared to 10-20% of each co-immunoprecipitation. Sepharose beads  
835 were substituted for Dynabeads® MyOne™ Streptavidin T1 or Dynabeads® Protein G  
836 (Thermo Fisher Scientific). For immunoprecipitation of Xrn1p-HA, we used an anti-HA-  
837 Biotin, rat monoclonal antibody (3F10 - #12158167001) (Roche), and for Gag-V5 a  
838 mouse monoclonal antibody (R960-25) (Life Technologies). RNase A was added to  
839 whole cell extracts at a concentration of (80 µg mL<sup>-1</sup>) and incubated with Dynabeads  
840 during immunoprecipitation for 2 hours at 4°C. RNase is in excess in our co-IP  
841 experiments, because significant RNA degradation occurred at concentrations of RNase  
842 8-fold lower than we used (Figure S5). RNA from samples with and without the addition  
843 of RNase A was recovered from yeast whole cell extracts after co-immunoprecipitation  
844 using Trizol according to manufacturer’s guidelines (Thermo Fisher). The extent of RNA  
845 degradation was measured using a 2200 TapeStation Instrument and a RNA  
846 screentape, as per manufacturer’s instructions (Agilent). An RNA integrity number (RIN)  
847 was calculated for each sample based upon criteria that reflect the quality of the RNA  
848 sample, as described previously [93].

849

#### 850 **Cloning and sequencing of SkV-L-A1**

851 dsRNAs were isolated from *S. kudriavzevii* as described above and processed according  
852 to the protocol of Potgieter *et al.* [62], with the following modifications: Reverse



853 transcription reactions were carried out using Superscript IV (Thermo Fisher), PCR  
854 amplification was performed by Phusion polymerase (Thermo Fisher), and cDNAs were  
855 cloned into pCR8 by TOPO-TA cloning (Thermo Fisher) before Sanger sequencing.

856

857 **Relative copy number determination of SkV-L-A1 in *S. kudriavzevii*.**

858 *S. kudriavzevii* was transformed with plasmids expressing *XRN1* from various  
859 *Saccharomyces* species, and an empty vector control using the LiAc method. The  
860 transformation was carried out at room temperature and heat shocked at 30°C. *S.*  
861 *kudriavzevii* transformants were recovered on CM –tryptophan and grown at room  
862 temperature. Clones were derived from two independent transformation reactions and  
863 grown to mid-log phase at room temperature. Total RNA was extracted from these  
864 cultures by first treating the cultures with Zymolase 100T (final concentration 100 µg mL<sup>-1</sup>  
865 ) for 2 hours at room temperature in buffer Y1 (1 M Sorbitol, 100 mM EDTA (pH 8.0), 14  
866 mM β-mercaptoethanol). Yeast spheroplasts were treated with Trizol to extract total  
867 cellular RNA, followed by a digestion of residual DNA by Turbo DNase for 30 min at  
868 37°C (Thermo Fisher). The RNeasy RNA cleanup protocol was used to remove DNase  
869 from the RNA samples (Qiagen), which were then stored at -80°C. RNA was converted  
870 to cDNA using Superscript III and random hexamer priming, as per manufacturers  
871 recommendations. cDNA samples were diluted 10-fold with distilled RNase-free water  
872 and used as templates for qPCR. Primers designed to recognize the RNAs  
873 corresponding to GAG of SkV-L-A1 (5'-TGCTTCTGATTCTTTTCCTGAATGG-3' and  
874 5'-GCCACTTACTCATCATCATCAAACG-3') and the cellular transcripts from *TAF10*  
875 (5'-ATGCAAACAATAGTCAAGCCAGAGC-3' and  
876 5'-TCACTGTCAGAACAACCTTTGCTTGC-3') were used to amplify cDNA using SYBR®  
877 Green PCR Master Mix (Thermo Fisher) on a CFX96 Touch™ (Biorad). *TAF10* was

878 used as a cellular reference gene to calculate the amount of viral cDNA within a given  
879 sample using the comparative  $C_T$  method [65].

880

881

## 882 **Acknowledgements**

883 The authors would like to thank Justin Fay, Emily Feldman, David Garfinkel, Aashiq  
884 Kachroo, Maryska Kaczmarek, Lawrence Kelley, Ed Louis, Nicholas Meyerson, Susan  
885 Rozmiarek, Soumitra Sau, Alex Stabell, Nahum Sonenberg, Cody Warren, Reed  
886 Wickner, Chris Yellman and Renate van Zandwijk for critical reagents, laboratory  
887 support, and insightful discussions.

888

## 889 **References**

890

- 891 1. Parker R. RNA Degradation in *Saccharomyces cerevisiae*. *Genetics*. 2012;191:  
892 671–702. doi:10.1534/genetics.111.137265
- 893 2. Hsu CL, Stevens A. Yeast cells lacking 5'→3' exoribonuclease 1 contain mRNA  
894 species that are poly(A) deficient and partially lack the 5' cap structure. *Mol Cell*  
895 *Biol*. 1993;13: 4826–4835. doi:10.1128/MCB.13.8.4826
- 896 3. Sheth U, Parker R. Decapping and decay of messenger RNA occur in cytoplasmic  
897 processing bodies. *Science*. 2003;300: 805–808. doi:10.1126/science.1082320
- 898 4. Anderson JS, Parker RP. The 3' to 5' degradation of yeast mRNAs is a general  
899 mechanism for mRNA turnover that requires the SKI2 DEVH box protein and 3' to  
900 5' exonucleases of the exosome complex. *The EMBO Journal*. EMBO Press;  
901 1998;17: 1497–1506. doi:10.1093/emboj/17.5.1497
- 902 5. Halbach F, Reichelt P, Rode M, Conti E. The Yeast Ski Complex: Crystal  
903 Structure and RNA Channeling to the Exosome Complex. *Cell*. Elsevier Inc;  
904 2013;154: 814–826. doi:10.1016/j.cell.2013.07.017
- 905 6. Chlebowski A, Lubas M, Jensen TH, Dziembowski A. RNA decay machines: The

- 906 exosome. *BBA - Gene Regulatory Mechanisms*. Elsevier B.V; 2013;1829: 552–  
907 560. doi:10.1016/j.bbagr.2013.01.006
- 908 7. Li Y, Masaki T, Yamane D, McGivern DR, Lemon SM. Competing and  
909 noncompeting activities of miR-122 and the 5' exonuclease Xrn1 in regulation of  
910 hepatitis C virus replication. *Proc Natl Acad Sci USA*. National Acad Sciences;  
911 2013;110: 1881–1886. doi:10.1073/pnas.1213515110
- 912 8. Esteban R, Vega L, Fujimura T. 20S RNA narnavirus Defies the Antiviral Activity  
913 of *SKI1/XRN1* in *Saccharomyces cerevisiae*. *Journal of Biological Chemistry*.  
914 2008;283: 25812–25820. doi:10.1074/jbc.M804400200
- 915 9. Chable-Bessia C, Meziane O, Latreille D, Triboulet R, Zamborlini A, Wagschal A,  
916 et al. Suppression of HIV-1 replication by microRNA effectors. *Retrovirology*.  
917 2009;6: 26. doi:10.1186/1742-4690-6-26
- 918 10. Guo X, Ma J, Sun J, Gao G. The zinc-finger antiviral protein recruits the RNA  
919 processing exosome to degrade the target mRNA. *Proc Natl Acad Sci USA*.  
920 2007;104: 151–156. doi:10.1073/pnas.0607063104
- 921 11. Ball SG, Tirtiaux C, Wickner RB. Genetic Control of L-A and L-(BC) dsRNA Copy  
922 Number in Killer Systems of *Saccharomyces cerevisiae*. *Genetics*. *Genetics*;  
923 1984;107: 199–217.
- 924 12. Fujimura T, Esteban R. Cap-snatching mechanism in yeast L-A double-stranded  
925 RNA virus. *Proc Natl Acad Sci USA*. 2011;108: 17667–17671.  
926 doi:10.1073/pnas.1111900108
- 927 13. Chapman EG, Costantino DA, Rabe JL, Moon SL, Wilusz J, Nix JC, et al. The  
928 structural basis of pathogenic subgenomic flavivirus RNA (sfRNA) production.  
929 *Science*. American Association for the Advancement of Science; 2014;344: 307–  
930 310. doi:10.1126/science.1250897
- 931 14. Masison DC, Blanc A, Ribas JC, Carroll K, Sonenberg N, Wickner RB. Decoying  
932 the cap- mRNA degradation system by a double-stranded RNA virus and poly(A)-  
933 mRNA surveillance by a yeast antiviral system. *Mol Cell Biol*. American Society  
934 for Microbiology (ASM); 1995;15: 2763–2771.
- 935 15. Gaglia MM, Covarrubias S, Wong W, Glaunsinger BA. A common strategy for  
936 host RNA degradation by divergent viruses. *J Virol*. 2012;86: 9527–9530.  
937 doi:10.1128/JVI.01230-12
- 938 16. Shimakami T, Yamane D, Jangra RK, Kempf BJ, Spaniel C, Barton DJ, et al.  
939 Stabilization of hepatitis C virus RNA by an Ago2-miR-122 complex. *Proc Natl*  
940 *Acad Sci USA*. National Acad Sciences; 2012;109: 941–946.  
941 doi:10.1073/pnas.1112263109
- 942 17. Dougherty JD, White JP, Lloyd RE. Poliovirus-mediated disruption of cytoplasmic  
943 processing bodies. *J Virol*. 2011;85: 64–75. doi:10.1128/JVI.01657-10
- 944 18. Chahar HS, Chen S, Manjunath N. P-body components LSM1, GW182, DDX3,

- 945 DDX6 and XRN1 are recruited to WNV replication sites and positively regulate  
946 viral replication. *Virology*. Elsevier; 2013;436: 1–7. doi:10.1016/j.virol.2012.09.041
- 947 19. Wickner RB, Fujimura T, Esteban R. Viruses and prions of *Saccharomyces*  
948 *cerevisiae*. *Adv Virus Res*. Elsevier; 2013;86: 1–36. doi:10.1016/B978-0-12-  
949 394315-6.00001-5
- 950 20. Naumov GI, Ivannikova YV, Chernov IY, Naumova ES. Natural polymorphism of  
951 the plasmid double-stranded RNA of the *Saccharomyces* yeasts. *Microbiology*.  
952 2009;78: 208–213. doi:10.1134/S0026261709020118
- 953 21. Drinnenberg IA, Weinberg DE, Xie KT, Mower JP, Wolfe KH, Fink GR, et al. RNAi  
954 in Budding Yeast. *Science*. 2009;326: 544–550. doi:10.1126/science.1176945
- 955 22. Icho T, Wickner RB. The double-stranded RNA genome of yeast virus L-A  
956 encodes its own putative RNA polymerase by fusing two open reading frames. *J*  
957 *Biol Chem*. American Society for Biochemistry and Molecular Biology; 1989;264:  
958 6716–6723.
- 959 23. Bruenn J, Keitz B. The 5' ends of yeast killer factor RNAs are pppGp. *Nucleic*  
960 *Acids Res*. 1976;3: 2427–2436.
- 961 24. Fujimura T, Esteban R. Yeast double-stranded RNA virus L-A deliberately  
962 synthesizes RNA transcripts with 5'-diphosphate. *Journal of Biological Chemistry*.  
963 2010;285: 22911–22918. doi:10.1074/jbc.M110.138982
- 964 25. Hannig EM, Thiele DJ, Leibowitz MJ. *Saccharomyces cerevisiae* killer virus  
965 transcripts contain template-coded polyadenylate tracts. *Mol Cell Biol*. 1984;4:  
966 101–109.
- 967 26. Widner WR, Wickner RB. Evidence that the SKI antiviral system of  
968 *Saccharomyces cerevisiae* acts by blocking expression of viral mRNA. *Mol Cell*  
969 *Biol*. 1993;13: 4331–4341. doi:10.1128/MCB.13.7.4331
- 970 27. Toh-e A, Guerry P, Wickner RB. Chromosomal superkiller mutants of  
971 *Saccharomyces cerevisiae*. *Journal of Bacteriology*. American Society for  
972 *Microbiology*; 1978;136: 1002–1007.
- 973 28. Rodríguez-Cousino N, Gómez P, Esteban R. L-A-lus, a new variant of the L-A  
974 totivirus found in wine yeasts with Klus killer toxin-encoding Mlus double-stranded  
975 RNA: possible role of killer toxin-encoding satellite RNAs in the evolution of their  
976 helper viruses. *Applied and Environmental Microbiology*. 2013;79: 4661–4674.  
977 doi:10.1128/AEM.00500-13
- 978 29. Parker R, Sheth U. P bodies and the control of mRNA translation and  
979 degradation. *Mol Cell*. 2007;25: 635–646. doi:10.1016/j.molcel.2007.02.011
- 980 30. Meyerson NR, Sawyer SL. Two-stepping through time: mammals and viruses.  
981 *Trends Microbiol*. 2011;19: 286–294. doi:10.1016/j.tim.2011.03.006
- 982 31. Daugherty MD, Malik HS. Rules of engagement: molecular insights from host-

- 983 virus arms races. *Annu Rev Genet.* 2012;46: 677–700. doi:10.1146/annurev-  
984 genet-110711-155522
- 985 32. Duggal NK, Emerman M. Evolutionary conflicts between viruses and restriction  
986 factors shape immunity. *Nat Rev Immunol.* 2012;12: 687–695.  
987 doi:10.1038/nri3295
- 988 33. Ng M, Ndungo E, Kaczmarek ME, Herbert AS, Binger T. Filovirus receptor NPC1  
989 contributes to species-specific patterns of ebolavirus susceptibility in bats. *eLife.*  
990 2015. doi:10.7554/eLife.11785.001
- 991 34. Demogines A, Abraham J, Choe H, Farzan M, Sawyer SL. Dual Host-Virus Arms  
992 Races Shape an Essential Housekeeping Protein. Sugden B, editor. *PLoS Biol.*  
993 2013;11: e1001571–13. doi:10.1371/journal.pbio.1001571
- 994 35. Checkley MA, Nagashima K, Lockett SJ, Nyswaner KM, Garfinkel DJ. P-body  
995 components are required for Ty1 retrotransposition during assembly of  
996 retrotransposition-competent virus-like particles. *Mol Cell Biol.* 2010;30: 382–398.  
997 doi:10.1128/MCB.00251-09
- 998 36. Berretta J, Pinskaya M, Morillon A. A cryptic unstable transcript mediates  
999 transcriptional *trans*-silencing of the Ty1 retrotransposon in *S. cerevisiae*. *Genes*  
1000 *Dev.* 2008;22: 615–626. doi:10.1101/gad.458008
- 1001 37. Dutko JA, Kenny AE, Gamache ER, Curcio MJ. 5' to 3' mRNA decay factors  
1002 colocalize with Ty1 gag and human APOBEC3G and promote Ty1  
1003 retrotransposition. *J Virol.* 2010;84: 5052–5066. doi:10.1128/JVI.02477-09
- 1004 38. Bilanchone V, Clemens K, Kaake R, Dawson AR, Matheos D, Nagashima K, et al.  
1005 Ty3 Retrotransposon Hijacks Mating Yeast RNA Processing Bodies to Infect New  
1006 Genomes. Hopper A, editor. *PLoS Genet.* 2015;11: e1005528–29.  
1007 doi:10.1371/journal.pgen.1005528
- 1008 39. Scholes DT, Banerjee M, Bowen B, Curcio MJ. Multiple regulators of Ty1  
1009 transposition in *Saccharomyces cerevisiae* have conserved roles in genome  
1010 maintenance. *Genetics.* Genetics Society of America; 2001;159: 1449–1465.
- 1011 40. Irwin B, Aye M, Baldi P, Beliakova-Bethell N, Cheng H, Dou Y, et al. Retroviruses  
1012 and yeast retrotransposons use overlapping sets of host genes. *Genome Res.*  
1013 2005;15: 641–654. doi:10.1101/gr.3739005
- 1014 41. Dakshinamurthy A, Nyswaner KM, Farabaugh PJ, Garfinkel DJ. BUD22 affects  
1015 Ty1 retrotransposition and ribosome biogenesis in *Saccharomyces cerevisiae*.  
1016 *Genetics.* 2010;185: 1193–1205. doi:10.1534/genetics.110.119115
- 1017 42. Griffith JL, Coleman LE, Raymond AS, Goodson SG, Pittard WS, Tsui C, et al.  
1018 Functional genomics reveals relationships between the retrovirus-like Ty1 element  
1019 and its host *Saccharomyces cerevisiae*. *Genetics.* 2003;164: 867–879.
- 1020 43. Hurst LD. The Ka/Ks ratio: diagnosing the form of sequence evolution. *Trends*  
1021 *Genet.* 2002;18: 486.

- 1022 44. Liti G, Carter DM, Moses AM, Warringer J, Parts L, James SA, et al. Population  
1023 genomics of domestic and wild yeasts. *Nature*. 2009;458: 337–341.  
1024 doi:10.1038/nature07743
- 1025 45. Naumov G, Naumova E, Masneuf-Pomarède I. Genetic identification of new  
1026 biological species *Saccharomyces arboricolus* Wang et Bai. *Antonie Van*  
1027 *Leeuwenhoek*. 2010;98: 1–7.
- 1028 46. Scannell DR, Zill OA, Rokas A, Payen C, Dunham MJ, Eisen MB, et al. The  
1029 awesome power of yeast evolutionary genetics: New genome sequences and  
1030 strain resources for the *Saccharomyces sensu stricto* genus. *G3 (Bethesda)*.  
1031 2011;1: 11–25. doi:10.1534/g3.111.000273
- 1032 47. Yang Z. PAML 4: Phylogenetic analysis by maximum likelihood. *Mol Biol Evol*.  
1033 2007;24: 1586–1591. doi:10.1093/molbev/msm088
- 1034 48. Pond SLK, Frost SDW. Datamonkey: rapid detection of selective pressure on  
1035 individual sites of codon alignments. *Bioinformatics*. Oxford University Press;  
1036 2005;21: 2531–2533. doi:10.1093/bioinformatics/bti320
- 1037 49. Burgess HM, Mohr I. Cellular 5′-3′ mRNA exonuclease Xrn1 controls double-  
1038 stranded RNA accumulation and anti-viral responses. *Cell Host Microbe*. 2015;17:  
1039 332–344. doi:10.1016/j.chom.2015.02.003
- 1040 50. Cheng CP, Serviène E, Nagy PD. Suppression of Viral RNA Recombination by a  
1041 Host Exoribonuclease. *J Virol*. 2006;80: 2631–2640. doi:10.1128/JVI.80.6.2631-  
1042 2640.2006
- 1043 51. Chapman EG, Moon SL, Wilusz J, Kieft JS. RNA structures that resist  
1044 degradation by Xrn1 produce a pathogenic Dengue virus RNA. *eLife*. 2014;3:  
1045 e01892–e01892. doi:10.7554/eLife.01892
- 1046 52. Moon SL, Blackinton JG, Anderson JR, Dozier MK, Dodd BJT, Keene JD, et al.  
1047 XRN1 Stalling in the 5′ UTR of Hepatitis C Virus and Bovine Viral Diarrhea Virus  
1048 Is Associated with Dysregulated Host mRNA Stability. Siddiqui A, editor. *PLoS*  
1049 *Pathog*. Public Library of Science; 2015;11: e1004708–21.  
1050 doi:10.1371/journal.ppat.1004708
- 1051 53. Serviène E, Shapka N, Cheng CP, Panavas T, Phuangrat B, Baker J, et al.  
1052 Genome-wide screen identifies host genes affecting viral RNA recombination.  
1053 *Proc Natl Acad Sci USA*. National Acad Sciences; 2005;102: 10545–10550.  
1054 doi:10.1073/pnas.0504844102
- 1055 54. Page AM, Davis K, Molineux C, Kolodner RD, Johnson AW. Mutational analysis of  
1056 exoribonuclease I from *Saccharomyces cerevisiae*. *Nucleic Acids Res*. 1998;26:  
1057 3707–3716.
- 1058 55. Schmitt MJ, Breinig F. Yeast viral killer toxins: lethality and self-protection. *Nat*  
1059 *Rev Microbiol*. 2006;4: 212–221. doi:10.1038/nrmicro1347
- 1060 56. Maule AP, Thomas PD. Strains of Yeast Lethal to Brewery Yeasts. *Journal of the*

- 1061 Institute of Brewing. 1973;79: 137–141.
- 1062 57. Blanc A, Ribas JC, Wickner RB. His-154 is involved in the linkage of the  
1063 *Saccharomyces cerevisiae* L-A double-stranded RNA virus Gag protein to the cap  
1064 structure of mRNAs and is essential for M1 .... Molecular and cellular .... 1994;14:  
1065 2664–2674.
- 1066 58. Kelley LA, Sternberg MJE. Protein structure prediction on the Web: a case study  
1067 using the Phyre server. Nat Protoc. 2009;4: 363–371. doi:10.1038/nprot.2009.2
- 1068 59. Chang JH, Xiang S, Xiang K, Manley JL, Tong L. Structural and biochemical  
1069 studies of the 5′-3′ exoribonuclease Xrn1. Nat Struct Mol Biol. 2011;18: 270–276.  
1070 doi:10.1038/nsmb.1984
- 1071 60. Esteban R, Wickner RB. Three different M1 RNA-containing viruslike particle  
1072 types in *Saccharomyces cerevisiae*: in vitro M1 double-stranded RNA synthesis.  
1073 Mol Cell Biol. 1986;6: 1552–1561.
- 1074 61. Naitow H, Canady MA, Lin T, Wickner RB, Johnson JE. Purification,  
1075 crystallization, and preliminary X-ray analysis of L-A: a dsRNA yeast virus. J  
1076 Struct Biol. 2001;135: 1–7. doi:10.1006/jsbi.2001.4371
- 1077 62. Potgieter AC, Page NA, Liebenberg J, Wright IM, Landt O, van Dijk AA. Improved  
1078 strategies for sequence-independent amplification and sequencing of viral double-  
1079 stranded RNA genomes. J Gen Virol. 2009;90: 1423–1432.  
1080 doi:10.1099/vir.0.009381-0
- 1081 63. Icho T, Wickner RB. The double-stranded RNA genome of yeast virus L-A  
1082 encodes its own putative RNA polymerase by fusing two open reading frames. J  
1083 Biol Chem. 1989;264: 6716–6723.
- 1084 64. Park C-M, Lopinski JD, Masuda J, Tzeng T-H, Bruenn JA. A second double-  
1085 stranded RNA virus from yeast. Virology. 1996;216: 451–454.  
1086 doi:10.1006/viro.1996.0083
- 1087 65. Schmittgen TD, Livak KJ. Analyzing real-time PCR data by the comparative CT  
1088 method. Nat Protoc. 2008;3: 1101–1108. doi:10.1038/nprot.2008.73
- 1089 66. Reineke LC, Lloyd RE. Diversion of stress granules and P-bodies during viral  
1090 infection. Virology. Elsevier; 2013;436: 255–267. doi:10.1016/j.virol.2012.11.017
- 1091 67. Silva PAGC, Pereira CF, Dalebout TJ, Spaan WJM, Bredenbeek PJ. An RNA  
1092 pseudoknot is required for production of yellow fever virus subgenomic RNA by  
1093 the host nuclease XRN1. J Virol. 2010;84: 11395–11406. doi:10.1128/JVI.01047-  
1094 10
- 1095 68. McBride RC, Boucher N, Park DS, Turner PE, Townsend JP. Yeast response to  
1096 LA virus indicates coadapted global gene expression during mycoviral infection.  
1097 FEMS Yeast Res. 2013;13: 162–179. doi:10.1111/1567-1364.12019
- 1098 69. Wloch-Salamon DM, Gerla D, Hoekstra RF, de Visser JAGM. Effect of dispersal

- 1099 and nutrient availability on the competitive ability of toxin-producing yeast. *Proc*  
1100 *Biol Sci.* 2008;275: 535–541. doi:10.1098/rspb.2007.1461
- 1101 70. McBride R, Greig D, Travisano M. Fungal Viral Mutualism Moderated by Ploidy.  
1102 *Evolution.* 2008;62: 2372–2380. doi:10.1111/j.1558-5646.2008.00443.x
- 1103 71. Drinnenberg IA, Fink GR, Bartel DP. Compatibility with killer explains the rise of  
1104 RNAi-deficient fungi. *Science.* 2011;333: 1592. doi:10.1126/science.1209575
- 1105 72. Ahn IP, Lee YH. A viral double-stranded RNA up regulates the fungal virulence of  
1106 *Nectria radicola*. *Mol Plant Microbe Interact.* 2001;14: 496–507.  
1107 doi:10.1094/MPMI.2001.14.4.496
- 1108 73. Márquez LM, Redman RS, Rodriguez RJ, Roossinck MJ. A virus in a fungus in a  
1109 plant: three-way symbiosis required for thermal tolerance. *Science.* 2007;315:  
1110 513–515. doi:10.1126/science.1136237
- 1111 74. Nuss DL. Hypovirulence: Mycoviruses at the fungal–plant interface. *Nat Rev*  
1112 *Microbiol.* 2005;3: 632–642. doi:10.1038/nrmicro1206
- 1113 75. Xie J, Jiang D. New Insights into Mycoviruses and Exploration for the Biological  
1114 Control of Crop Fungal Diseases. *Annu Rev Phytopathol.* 2014;52: 45–68.  
1115 doi:10.1146/annurev-phyto-102313-050222
- 1116 76. Yu X, Li B, Fu Y, Xie J, Cheng J. Extracellular transmission of a DNA mycovirus  
1117 and its use as a natural fungicide. 2013. pp. 1452–1457.  
1118 doi:10.1073/pnas.1213755110/-/DCSupplemental
- 1119 77. Chen B, Nuss DL. Infectious cDNA clone of hypovirus CHV1-Euro7: a  
1120 comparative virology approach to investigate virus-mediated hypovirulence of the  
1121 chestnut blight fungus *Cryphonectria parasitica*. *J Virol.* 1999;73: 985–992.
- 1122 78. Sun Q, Choi GH, Nuss DL. A single Argonaute gene is required for induction of  
1123 RNA silencing antiviral defense and promotes viral RNA recombination. 2009.
- 1124 79. Demogines A, Abraham J, Choe H, Farzan M, Sawyer SL. Dual host-virus arms  
1125 races shape an essential housekeeping protein. *PLoS Biol.* *Public Library of*  
1126 *Science*; 2013;11: e1001571. doi:10.1371/journal.pbio.1001571
- 1127 80. Zhang ZD, Weinstock G, Gerstein M. Rapid evolution by positive Darwinian  
1128 selection in T-cell antigen CD4 in primates. *J Mol Evol.* 2008;66: 446–456.  
1129 doi:10.1007/s00239-008-9097-1
- 1130 81. Demogines A, Farzan M, Sawyer SL. Evidence for ACE2-utilizing coronaviruses  
1131 (CoVs) related to severe acute respiratory syndrome CoV in bats. *J Virol.*  
1132 *American Society for Microbiology*; 2012;86: 6350–6353. doi:10.1128/JVI.00311-  
1133 12
- 1134 82. Demogines A, Truong KA, Sawyer SL. Species-specific features of DARC, the  
1135 primate receptor for *Plasmodium vivax* and *Plasmodium knowlesi*. *Mol Biol Evol.*  
1136 *Oxford University Press*; 2012;29: 445–449. doi:10.1093/molbev/msr204



- 1137 83. Kaelber JT, Demogines A, Harbison CE, Allison AB, Goodman LB, Ortega AN, et  
1138 al. Evolutionary reconstructions of the transferrin receptor of Caniforms supports  
1139 canine parvovirus being a re-emerged and not a novel pathogen in dogs. Villarreal  
1140 L, editor. PLoS Pathog. 2012;8: e1002666. doi:10.1371/journal.ppat.1002666.t002
- 1141 84. Schatz P. Plasmid construction by homologous recombination in yeast. Gene.  
1142 1987;58: 201–216.
- 1143 85. Alberti S, Gitler AD, Lindquist S. A suite of Gateway cloning vectors for high-  
1144 throughput genetic analysis in *Saccharomyces cerevisiae*. Yeast. 2007;24: 913–  
1145 919. doi:10.1002/yea.1502
- 1146 86. Young TW. The genetic manipulation of killer character into brewing yeast.  
1147 Journal of the Institute of Brewing. 1981;87: 292–295.
- 1148 87. Baudin A, Ozier-Kalogeropoulos O, Denouel A, Lacroute F, Cullin C. A simple and  
1149 efficient method for direct gene deletion in *Saccharomyces cerevisiae*. Nucleic  
1150 Acids Res. 1993;21: 3329–3330.
- 1151 88. Ribas JC, Wickner RB. The Gag domain of the Gag-Pol fusion protein directs  
1152 incorporation into the L-A double-stranded RNA viral particles in *Saccharomyces*  
1153 *cerevisiae*. J Biol Chem. 1998;273: 9306–9311.
- 1154 89. Curcio MJ, Garfinkel DJ. Single-step selection for Ty1 element retrotransposition.  
1155 Proc Natl Acad Sci USA. 1991;88: 936–940.
- 1156 90. Gerace E, Moazed D. Coimmunoprecipitation of Proteins from Yeast. Laboratory  
1157 Methods in Enzymology: Protein Part C. Elsevier; 2014. pp. 13–26.  
1158 doi:10.1016/B978-0-12-420119-4.00002-1
- 1159 91. Liti G, Nguyen Ba AN, Blythe M, Müller CA, Bergström A, Cubillos FA, et al. High  
1160 quality *de novo* sequencing and assembly of the *Saccharomyces arboricolus*  
1161 genome. BMC Genomics. BioMed Central Ltd; 2013;14: 69. doi:10.1186/1471-  
1162 2164-14-69
- 1163 92. Suyama M, Torrents D, Bork P. PAL2NAL: robust conversion of protein sequence  
1164 alignments into the corresponding codon alignments. Nucleic Acids Res. Oxford  
1165 University Press; 2006;34: W609–12. doi:10.1093/nar/gkl315
- 1166 93. Schroeder A, Mueller O, Stocker S, Salowsky R, Leiber M, Gassmann M, et al.  
1167 The RIN: an RNA integrity number for assigning integrity values to RNA  
1168 measurements. BMC Mol Biol. 2006;7: 3. doi:10.1186/1471-2199-7-3
- 1169 94. Bielawski JP, Yang Z. Maximum likelihood methods for detecting adaptive  
1170 evolution after gene duplication. J Struct Funct Genomics. 2003;3: 201–212.
- 1171
- 1172
- 1173

1174 **SUPPORTING INFORMATION LEGENDS**

1175

1176 **Figure S1. Confirmation that L-A virus dsRNA can be detected within *S.***

1177 *cerevisiae*. We wished to confirm that the dsRNA being detected in figure 2A of the  
1178 paper was actually L-A in origin. dsRNA samples were used as templates for L-A  
1179 negative-strand-specific cDNA synthesis and subsequent PCR amplification. Specificity  
1180 of our primers for L-A was confirmed by a positive control where plasmid cloned L-A  
1181 cDNA was used as a template (lane 7) and a negative control where RNA extracted from  
1182 *S. cerevisiae* 2405 (L-A<sup>-</sup>; M) was used as a template (lane 6).

1183

1184 **Figure S2. Expression of *XRN1* and its impact on killer toxin production within *S.***

1185 *cerevisiae*. Representative pictures of kill zones produced by individual clones of *S.*  
1186 *cerevisiae xrn1Δ* L-A<sup>+</sup> Killer<sup>+</sup> expressing *XRN1* from different species. The scale bar  
1187 represents 5 mm.

1188

1189 **Figure S3. Chimeric *XRN1* genes reveal the importance of the C-terminal domain  
1190 for efficient curing of the killer phenotype. (Left) Schematic representations of**

1191 chimeric proteins derived from various C-terminal domain fusions between *XRN1* from  
1192 *S. cerevisiae* (white) and *S. kudriavzevii* (black). Dotted lines represent the boundaries  
1193 of the chimeric fusions with the numbering representing the amino acid position. (Right)  
1194 Clonal isolates of a killer *S. cerevisiae* strain expressing chimeric Xrn1p proteins were  
1195 assayed for loss of the killer phenotype resulting in “cured” clones (error bars represent  
1196 SEM, n>3).

1197

1198 **Figure S4. Chimeric *XRN1* genes are able to restore normal growth and benomyl**  
1199 **resistance to *S. cerevisiae xrn1*Δ** (A) The doubling time of *S. cerevisiae xrn1*Δ  
1200 complemented with *Saccharomyces XRN1* chimeras and *XRN1* from *S. cerevisiae* and  
1201 *S. kudriavzevii*. (B) The growth, morphology, and benomyl sensitivity of *S. cerevisiae*  
1202 *xrn1*Δ cultured on YPD solid media, and the effect of complementation with *XRN1*  
1203 chimeras.

1204

1205 **Figure S5. Co-immunoprecipitation of Gag by Xrn1p is not affected by the**  
1206 **digestion of cellular RNAs.** (A) The extent of RNA degradation by RNase A in yeast  
1207 whole cell lysates was measured using a 2200 TapeStation Instrument with different  
1208 concentrations of RNase A. RNA integrity numbers (RIN) were calculated to assess the  
1209 integrity of the RNA within whole protein extract samples with and without the addition of  
1210 RNase A [93]. (B) Western blot analysis of Xrn1p and L-A Gag co-immunoprecipitation.  
1211 HA-tagged and untagged Xrn1p from either *S. cerevisiae* or *S. kudriavzevii* were  
1212 immunoprecipitated in the presence of Gag-V5 with the addition of RNase A. Adh1 was  
1213 used in all panels as a loading control to ensure equal input of total protein and the  
1214 specificity of immunoprecipitation.

1215

1216 **Figure S6. RNA sequence conservation and the phylogenetic relationship of L-A-**  
1217 **like totivirus.** (A) RNA secondary structure models of functionally important totivirus  
1218 RNA sequences are based upon the sequence of SkV-L-A1 unless otherwise stated,  
1219 and show the predicted base pairing between nucleotides. (B) The evolutionary history  
1220 of totivirus was inferred by using the Maximum Likelihood method with bootstrap values  
1221 from 100 replicates shown at each node. The amino acid and nucleotide sequence of  
1222 the *POL* and *GAG* gene from six totiviruses (GenBank accession numbers: SkV-L-A1

1223 (this study; KX601068), L-A-lus (JN819511), L-A (NC\_003745), tuber aestivum virus 1  
1224 (TAV1) (HQ158596), black raspberry virus F (BRVF) (NC\_009890), L-BC (NC\_001641)).  
1225 The tree is drawn to scale, with branch lengths measured in the number of substitutions  
1226 per site.

1227

1228 **Figure S7. Expression of heterospecific *XRN1* within *S. kudriavzevii* and the effect**  
1229 **on growth and colony morphology.** The growth of *S. kudriavzevii* expressing each of  
1230 these *XRN1* genes was measured by growing upon agar plates (left) or in liquid culture  
1231 (right) and comparing to a wildtype strain that was not complemented with *XRN1*.

1232

1233 **Table S1. Evolutionary analysis of genes involved in RNA metabolism.** This table  
1234 summarizes the results from all of the evolutionary analyses that were performed.

1235

1236 **Table S2. Relevant plasmids.** This table lists information on the various plasmids  
1237 constructed and/or used in this study.

1238

1239 **Table S3. Relevant yeast strains and species.** This table lists information on the  
1240 various *Saccharomyces* strains constructed and/or used in this study.

1241

1242 **File S1. Xrn1 structure.** This file contains PDB coordinates for the PHYRE modeled  
1243 structure of *S. cerevisiae* Xrn1p.

1244

1245 **File S2. Plasmid sequences.** This file contains sequences of plasmids constructed as  
1246 part of this study.

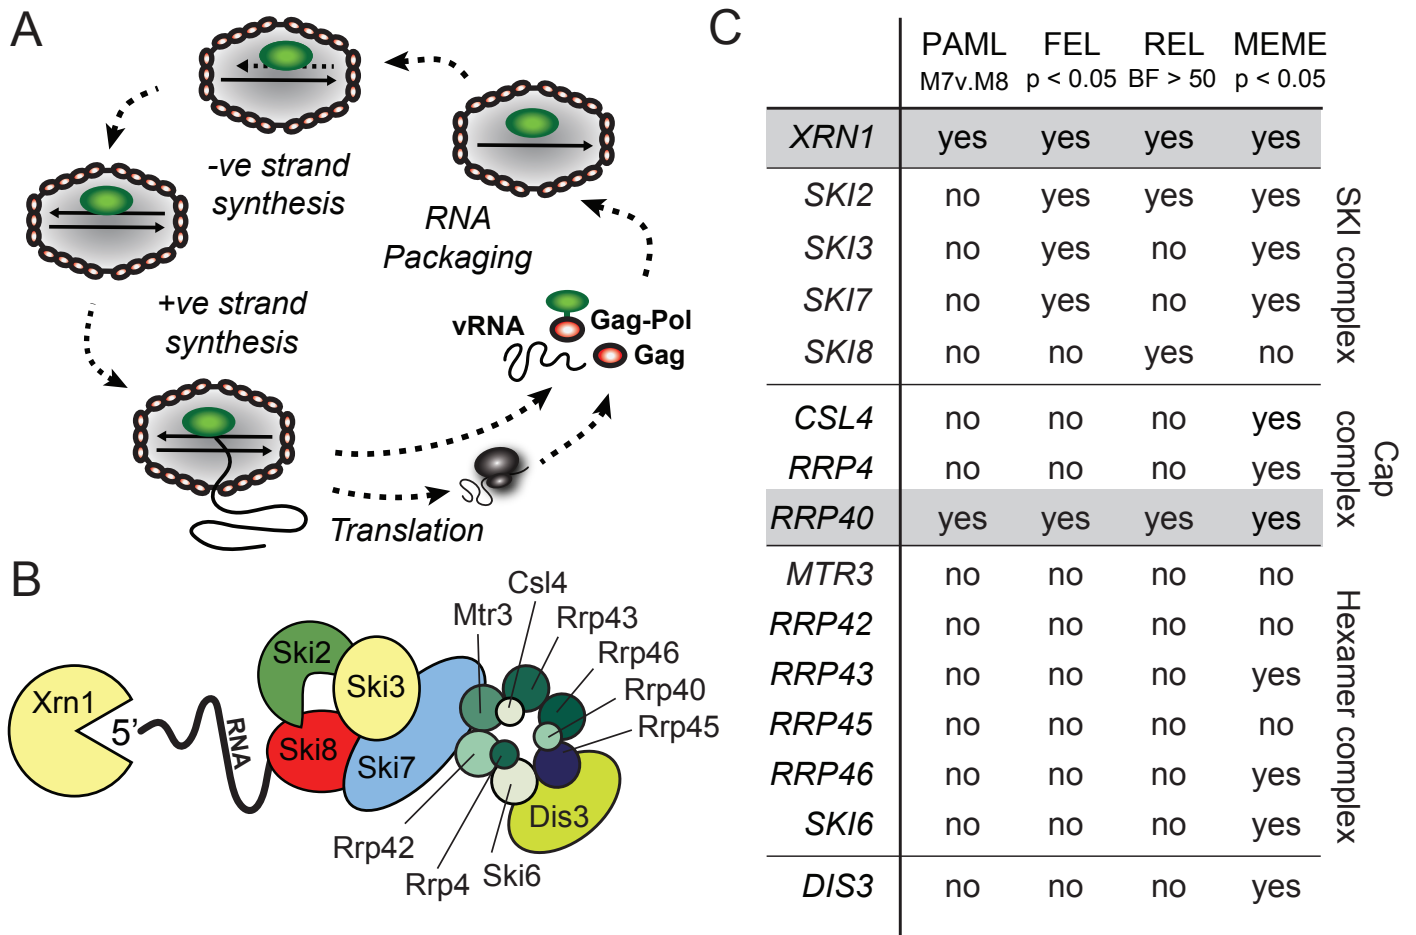

Figure 1

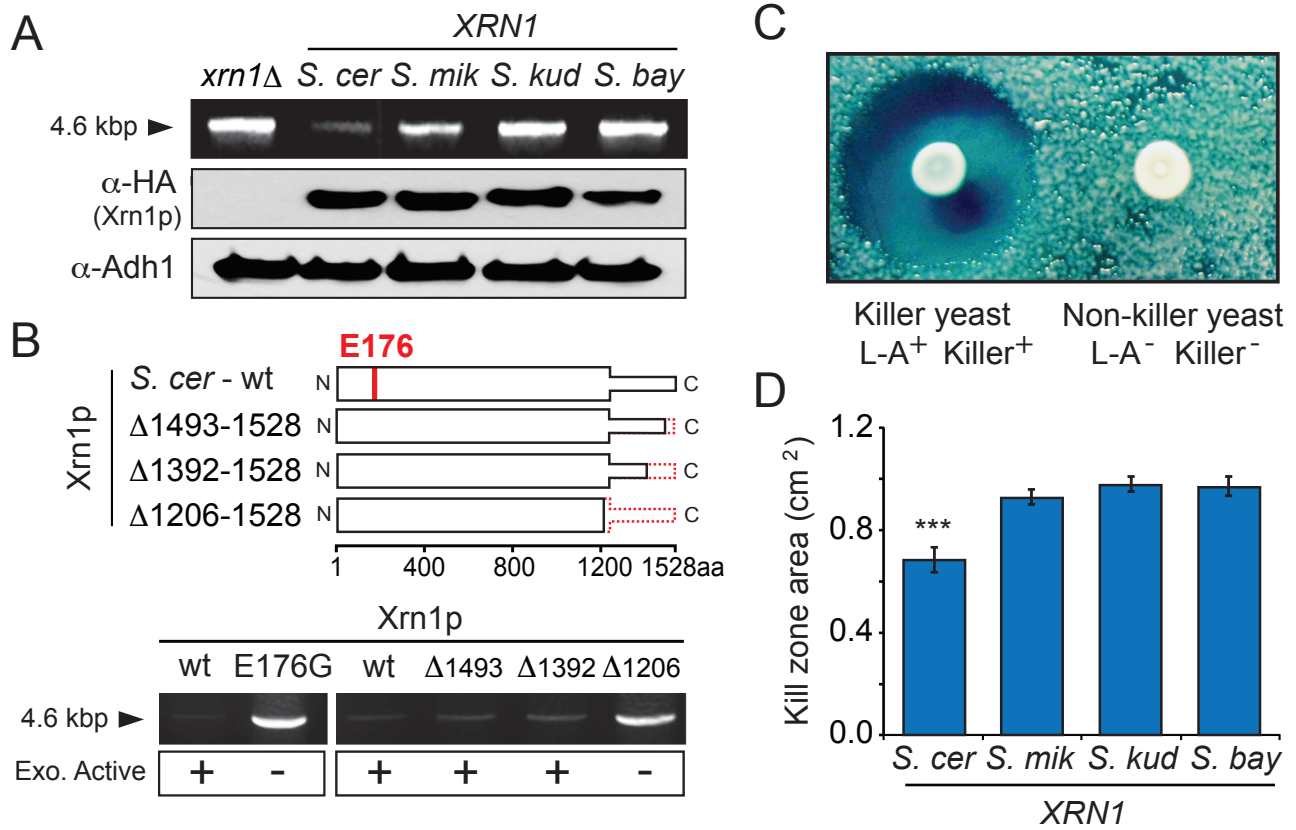

Figure 2

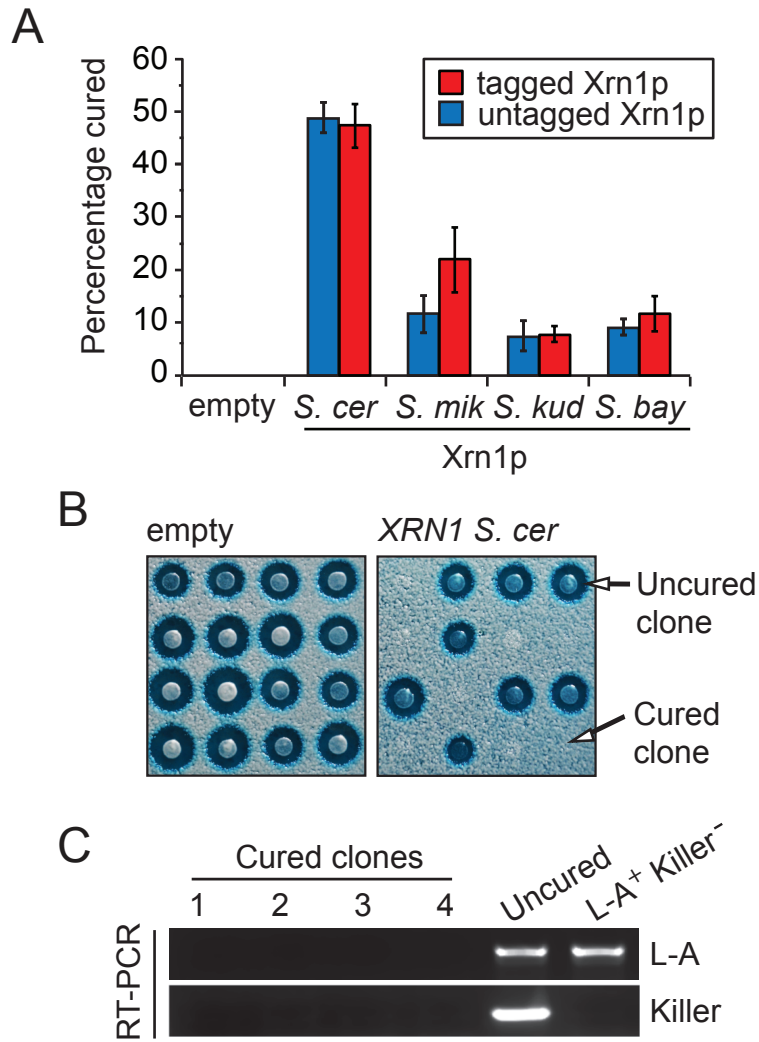

Figure 3

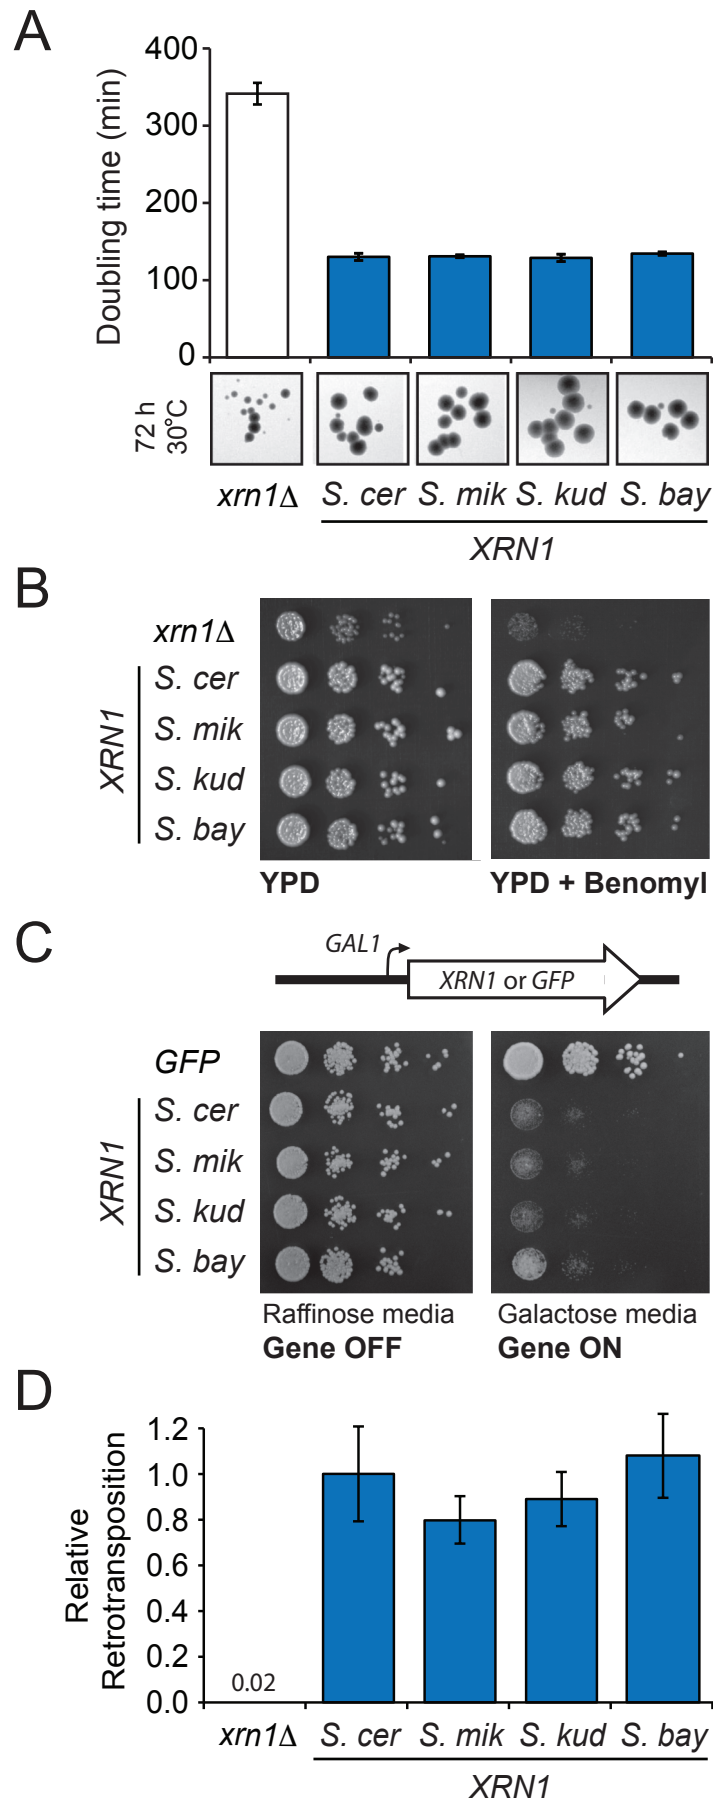

Figure 4



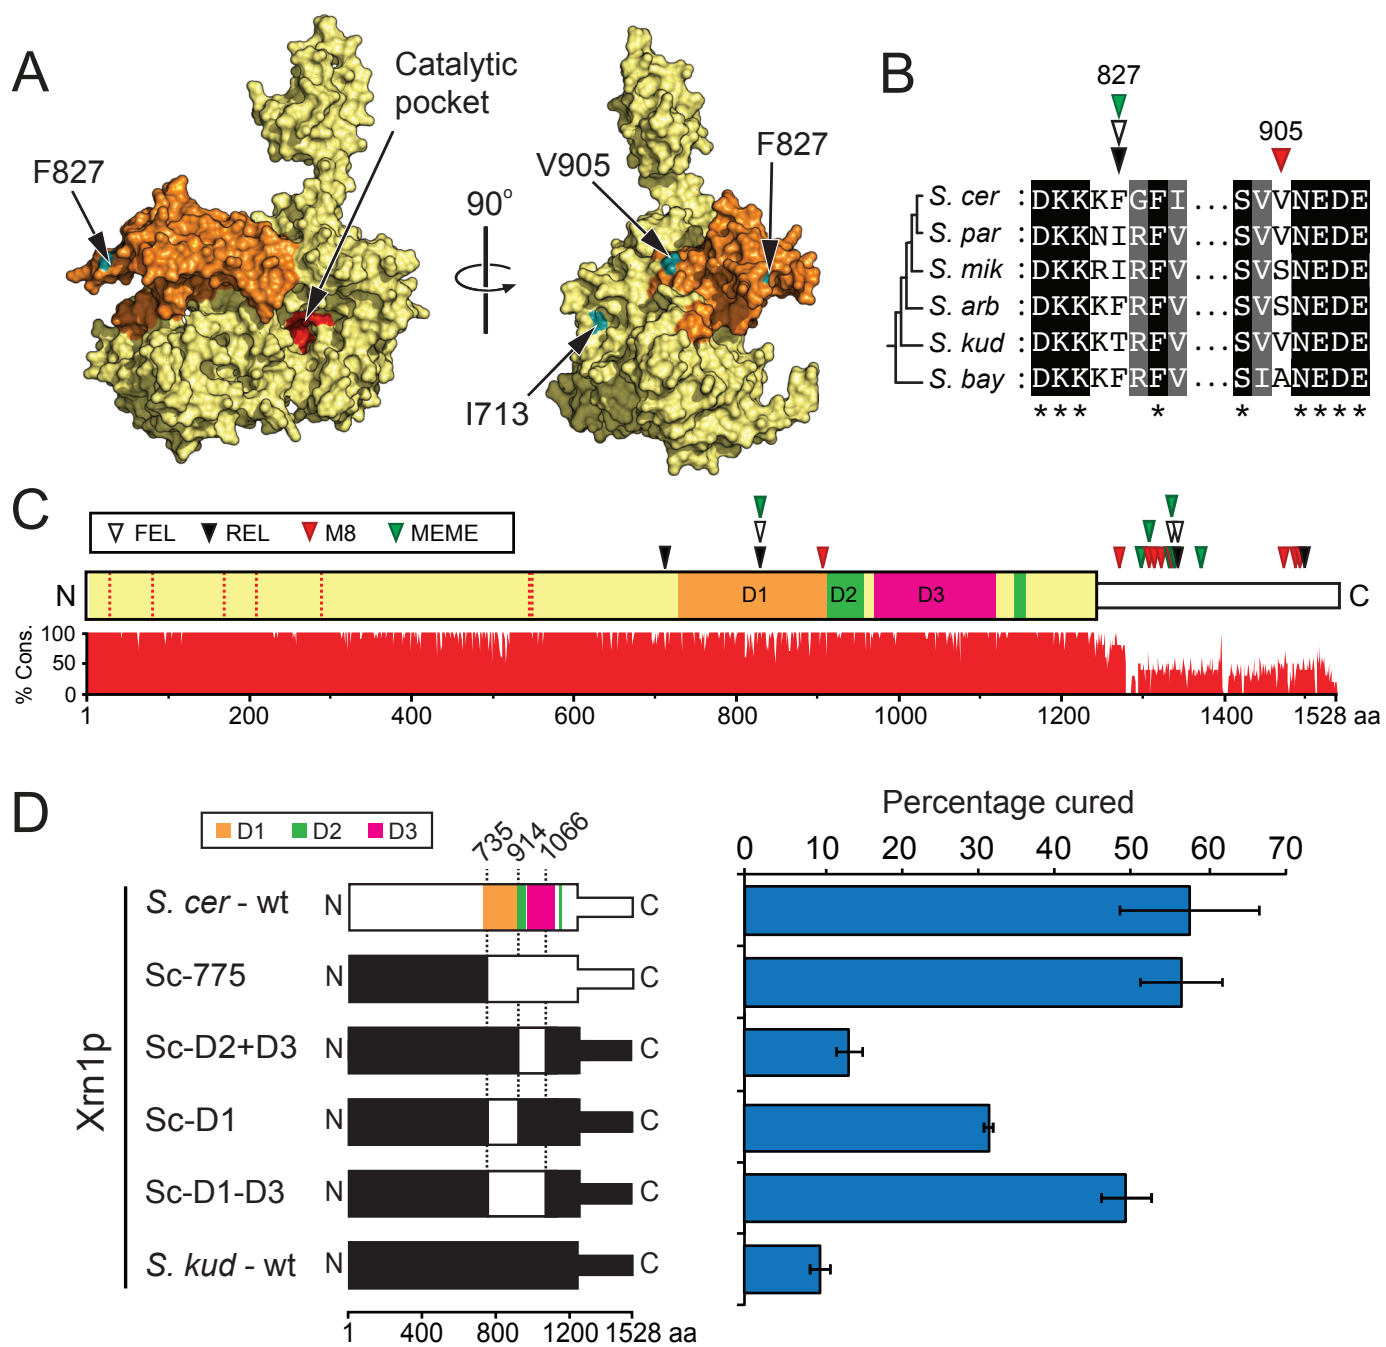

Figure 5

**A**

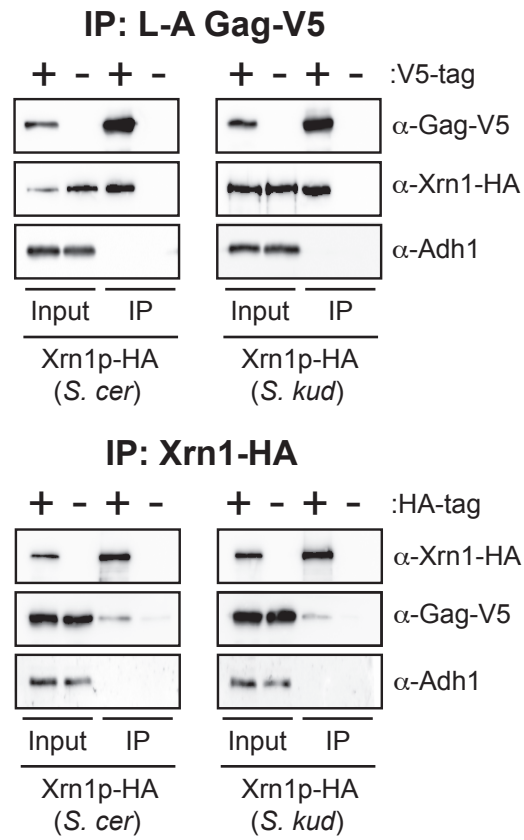

**B**

**IP: L-A Gag (native)**

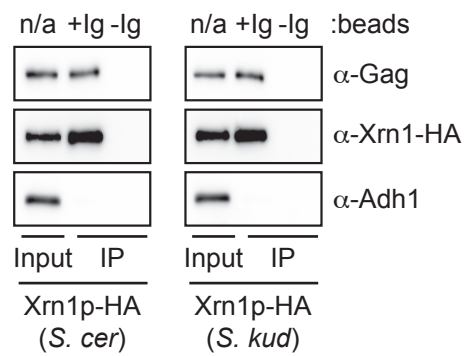

**Figure 6**

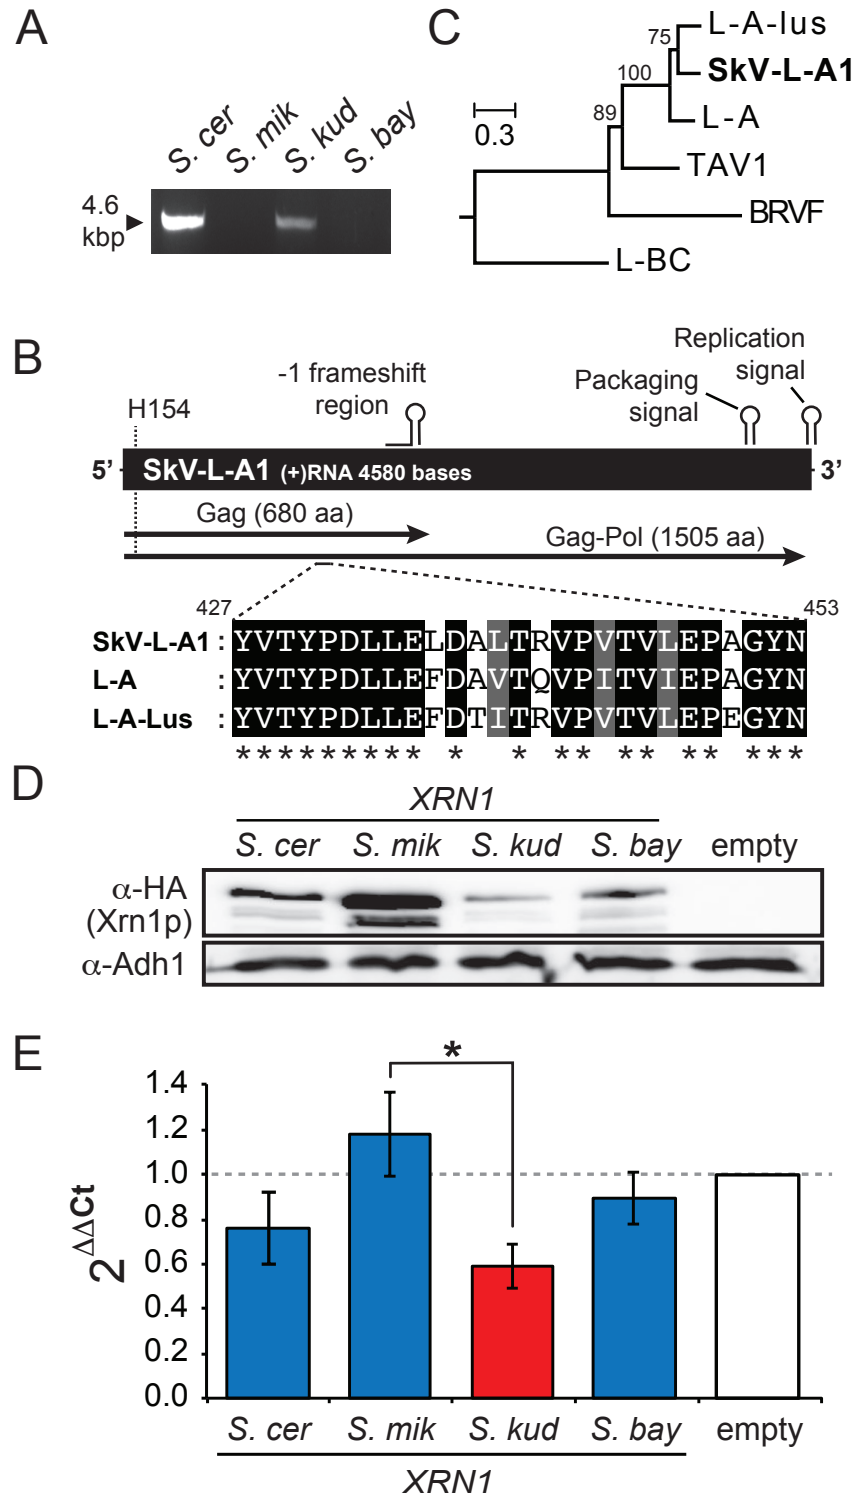

Figure 7

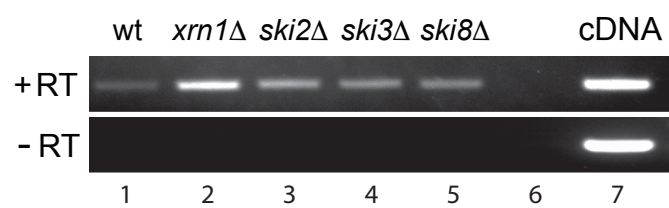

Figure S1

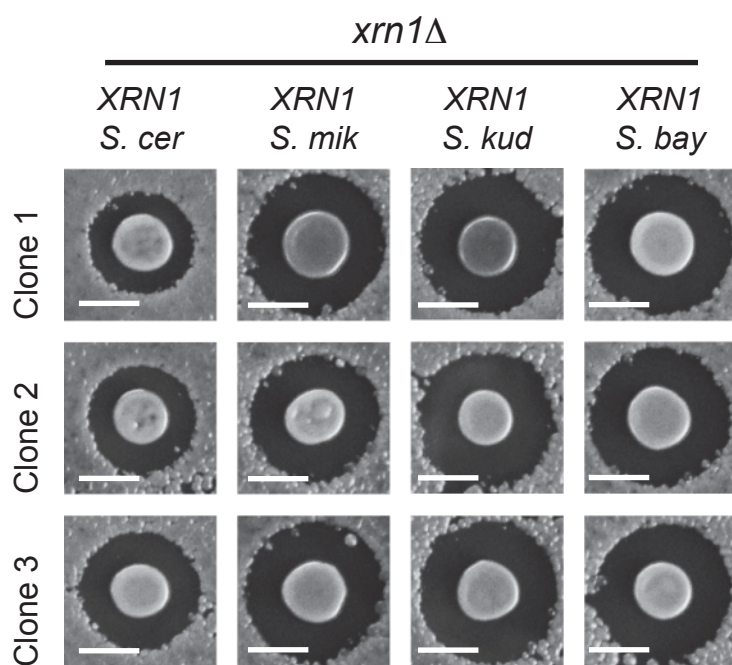

Figure S2

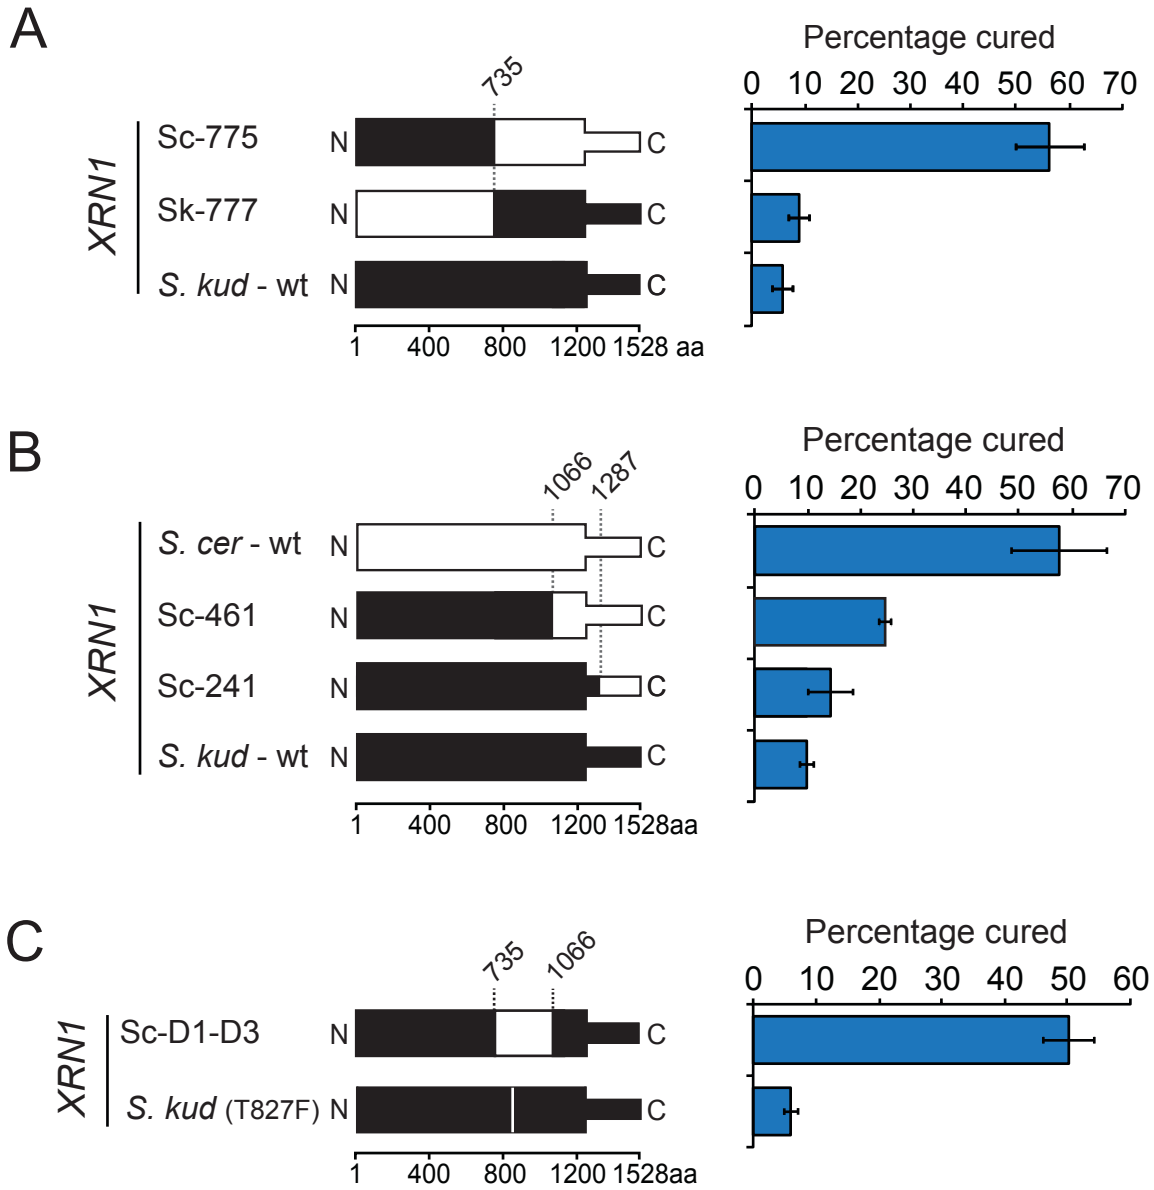

Figure S3

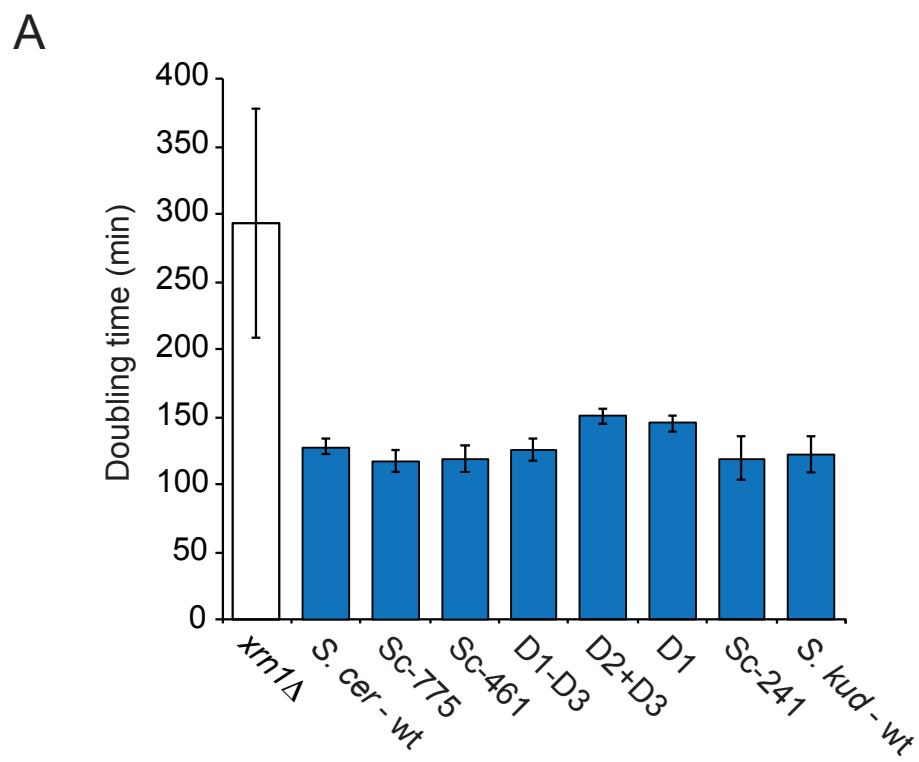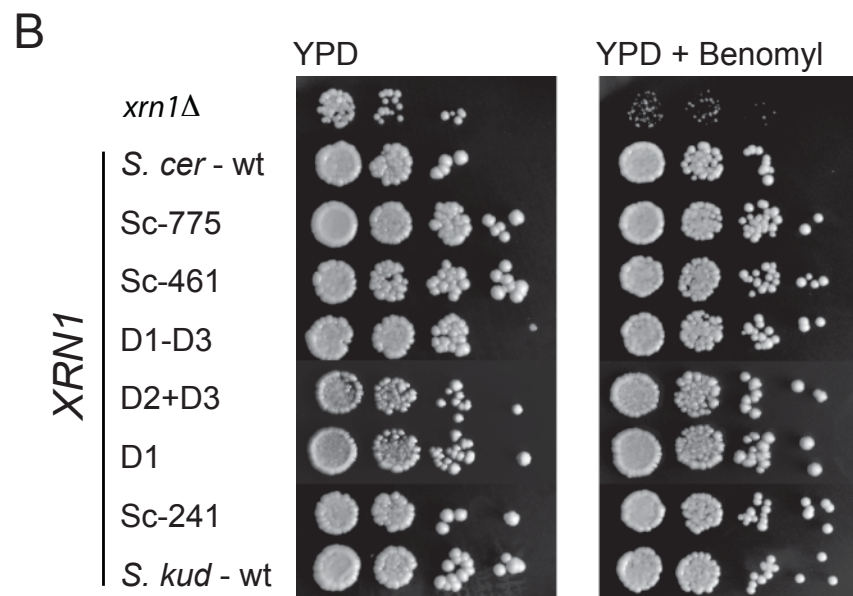

Figure S4

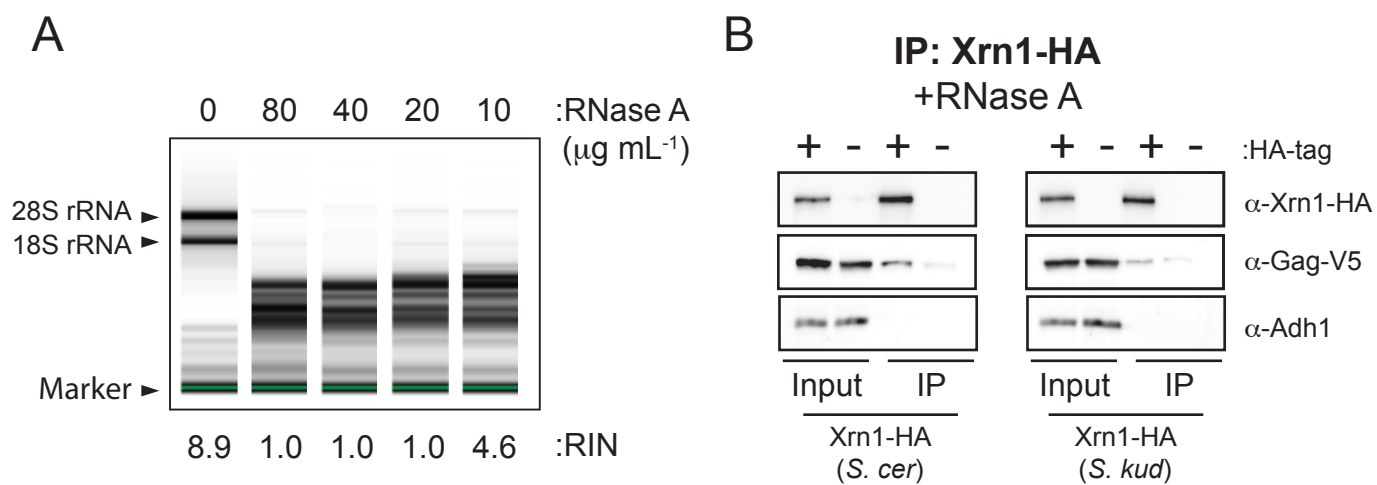

Figure S5



A

**-1 Frameshift Region**

bioRxiv preprint doi: <https://doi.org/10.1101/069299>; this version posted August 16, 2016. The copyright holder for this preprint (which was not certified by peer review) is the author/funder. All rights reserved. No reuse allowed without permission.

|          |                                                     |
|----------|-----------------------------------------------------|
| SkV-L-A1 | GGGUUUAGGAGUGGUAGGUCUUACGAUGCCAGCAGUAAUGCCU--ACCG   |
| L-A-lus  | GGGUUUAGGAGUGGUAGGUCUUACGAUGCCAGCCGUAAUGCCU--ACCG   |
| L-A      | GGGUUUAGGAGUGGUAGGUCUUACGAUGCCAGCUGUAAUGCCU--ACCG   |
| TAV1     | GGGUUUAAACGAUGGUAGGCAUGGCCUCAACCAGCGAUCAUGCCGCAACCA |
|          | ***** * * ***** * ***** ***                         |

-1 frame  
Gly Phe Arg  
5' GGGUUUAGGAGU G  
Gly Leu Gly 3'  
0 frame

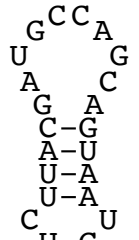

**Packaging Signal**

|          |                           |
|----------|---------------------------|
| SkV-L-A1 | CGAAAUAGAU GAUCCAUCAUUUUG |
| L-A-lus  | CGAAAUAGAU GAUCCAUCAUUUUG |
| L-A      | CGAAAUAGAU GAUCCAUCAUUUUG |
| TAV1     | UGAAAUAGAC GAUCCGUCAUUUUG |
|          | ***** * *****             |

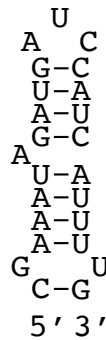

**Replication Signal**

|          |                       |
|----------|-----------------------|
| SkV-L-A1 | AAUGGUUUUAUACCCAUAUGC |
| L-A-lus  | GAGGUUUUUUACCCAUAUGC  |
| L-A      | AAUGGGAAUUACCCAUAUGC  |
| TAV1     | AAGGUAGAAUACCAUAU--   |
|          | * * *****             |

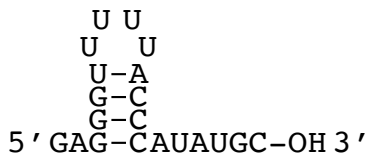

**L-A-lus**  $\Delta G$  -5.9 kCal/mol

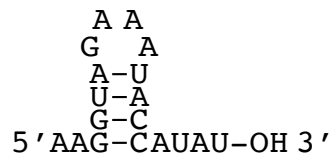

**TAV1**  $\Delta G$  -6.0 kCal/mol

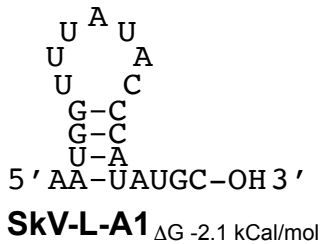

**SkV-L-A1**  $\Delta G$  -2.1 kCal/mol

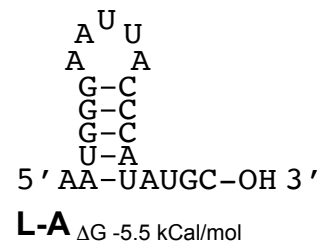

**L-A**  $\Delta G$  -5.5 kCal/mol

B

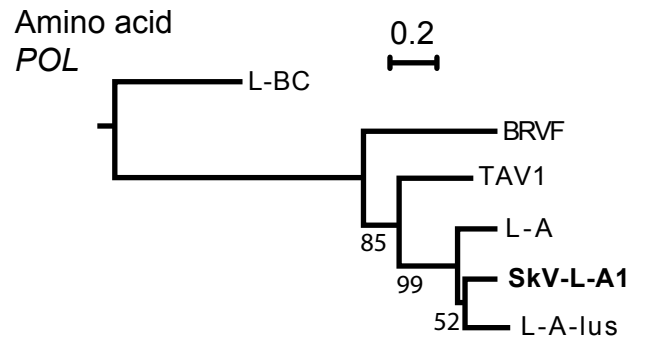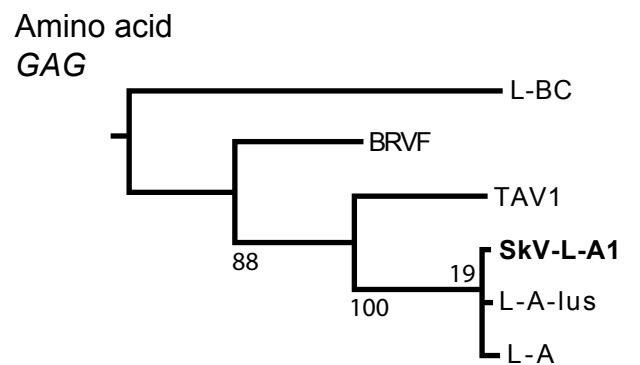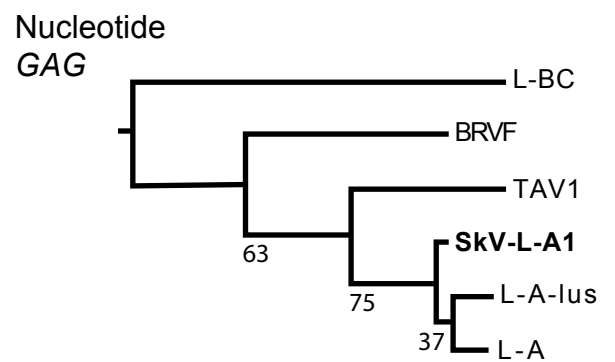

Figure S6

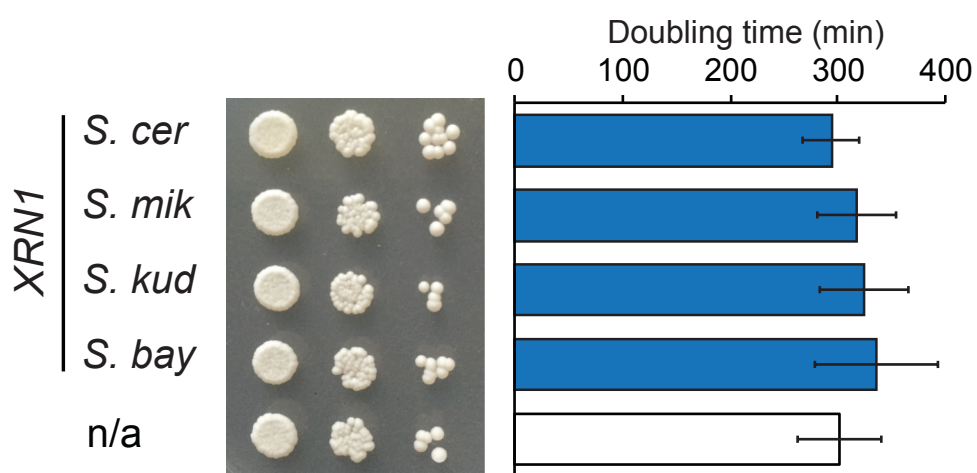

Figure S7
